# Supplementary material for: Efficacy of MRI-guided rTMS for post-traumatic stress disorder by modulating amygdala activity: study protocol for a randomised controlled trial
Source: PubMed Central journal article supplement — BMJ Open. 2024 Jul 3;14(7):e081751. doi: 10.1136/bmjopen-2023-081751 (PMC11227799; doi:10.1136/bmjopen-2023-081751), 2024-07-03
Supplement: bmjopen-2023-081751.draft_revisions.pdf [file bmjopen-2023-081751.draft_revisions.pdf]

# BMJ Open

BMJ Open is committed to open peer review. As part of this commitment we make the peer review history of every article we publish publicly available.

When an article is published we post the peer reviewers' comments and the authors' responses online. We also post the versions of the paper that were used during peer review. These are the versions that the peer review comments apply to.

The versions of the paper that follow are the versions that were submitted during the peer review process. They are not the versions of record or the final published versions. They should not be cited or distributed as the published version of this manuscript.

BMJ Open is an open access journal and the full, final, typeset and author-corrected version of record of the manuscript is available on our site with no access controls, subscription charges or pay-per-view fees (<http://bmjopen.bmj.com>).

If you have any questions on BMJ Open's open peer review process please email [info.bmjopen@bmj.com](mailto:info.bmjopen@bmj.com)

# BMJ Open

## Efficacy of MRI-guided rTMS for posttraumatic stress disorder by modulating amygdala activity: study protocol for a randomized controlled trial

|                               |                                                                                                                                                                                                                                                                                                                                                                                                                                                                                                                                                                                                                                                                                                                                                              |
|-------------------------------|--------------------------------------------------------------------------------------------------------------------------------------------------------------------------------------------------------------------------------------------------------------------------------------------------------------------------------------------------------------------------------------------------------------------------------------------------------------------------------------------------------------------------------------------------------------------------------------------------------------------------------------------------------------------------------------------------------------------------------------------------------------|
| Journal:                      | <i>BMJ Open</i>                                                                                                                                                                                                                                                                                                                                                                                                                                                                                                                                                                                                                                                                                                                                              |
| Manuscript ID                 | bmjopen-2023-081751                                                                                                                                                                                                                                                                                                                                                                                                                                                                                                                                                                                                                                                                                                                                          |
| Article Type:                 | Protocol                                                                                                                                                                                                                                                                                                                                                                                                                                                                                                                                                                                                                                                                                                                                                     |
| Date Submitted by the Author: | 06-Nov-2023                                                                                                                                                                                                                                                                                                                                                                                                                                                                                                                                                                                                                                                                                                                                                  |
| Complete List of Authors:     | Zhang, Yaochi; Xijing Hospital of Air Force Military Medical University, Psychiatry<br>Cai, Min; Xijing Hospital of Air Force Military Medical University<br>Peng, Zhengwu; Xijing Hospital of Air Force Military Medical University, Psychiatry<br>Tang, Nailong; Xijing Hospital of Air Force Military Medical University, Psychiatry<br>Zhang, Yuyu; Xijing Hospital of Air Force Military Medical University<br>Liu, Nian; Xijing Hospital of Air Force Military Medical University,<br>Lv, Runxin; Xijing Hospital of Air Force Military Medical University<br>Meng, Yumeng; Xijing Hospital of Air Force Military Medical University, Psychiatry<br>Wang, Hua-Ning; Xijing Hospital of Air Force Military Medical University, Department of Psychiatry |
| Keywords:                     | Transcranial Magnetic Stimulation, PSYCHIATRY, NEUROLOGY                                                                                                                                                                                                                                                                                                                                                                                                                                                                                                                                                                                                                                                                                                     |
|                               |                                                                                                                                                                                                                                                                                                                                                                                                                                                                                                                                                                                                                                                                                                                                                              |

SCHOLARONE™  
Manuscripts

1  
2  
3 **Title:** Efficacy of MRI-guided rTMS for posttraumatic stress disorder by modulating  
4 amygdala activity: study protocol for a randomized controlled trial  
5  
6  
7

8 **Corresponding author:** Dr Huaning Wang

9 Mailing address: Department of Psychiatry, Xijing Hospital, The Fourth Military  
10 Medical University, Xi'an, Shaanxi, China

11 Email: xskzhu@fmmu.edu.cn.

12 Telephone: 0086-13609161341  
13  
14  
15  
16

17 **All authors:**

18 Yaochi Zhang,<sup>1,2</sup> Min Cai,<sup>1</sup> Zhengwu Peng,<sup>1</sup> Nailong Tang,<sup>1</sup> Yuyu Zhang,<sup>1</sup> Nian Liu,<sup>1</sup>  
19 Runxin Lv,<sup>1</sup> Yumeng Meng,<sup>1,2</sup> Huaning Wang<sup>1</sup>

20 <sup>1</sup>Department of Psychiatry, Xijing Hospital, The Fourth Military Medical University,  
21 Xi'an, Shaanxi, China.  
22

23 <sup>2</sup>Xi'an Medical University, Xi'an, Shaanxi, China.  
24  
25  
26  
27

28 **Keywords:**

29 Posttraumatic Stress Disorder, Transcranial Magnetic Stimulation, amygdala,  
30 ventrolateral prefrontal cortex  
31  
32  
33  
34  
35  
36  
37  
38  
39  
40  
41  
42  
43  
44  
45  
46  
47  
48  
49  
50  
51  
52  
53  
54  
55  
56  
57  
58  
59  
60

**Word count:** 3443

# ABSTRACT

## Introduction

Posttraumatic stress disorder (PTSD) is a prevalent and severe psychiatric disorder. Repetitive transcranial magnetic stimulation (rTMS) targeting the dorsolateral prefrontal cortex provides limited relief for symptoms of PTSD. This study will be conducted to validate the efficacy of MRI-guided rTMS in targeting the sites most closely associated with the amygdala for PTSD patients. We hypothesize that the intervention will improve clinical symptoms by decreasing amygdala activity in patients.

## Methods and analysis

A randomized, double-blind, sham-controlled trial will be conducted. Forty-eight eligible PTSD patients will be randomly assigned to receive either active or sham MRI-guided rTMS for 10 consecutive days after the initial MRI scans. MRI scans will be recollected at the end of the intervention. Clinical assessments will be performed at baseline, treatment day 5, treatment day 10, and 2 weeks, 4 weeks, 8 weeks after completion of the intervention to monitor changes in clinical symptoms. The primary assessment outcome is the change in PTSD symptoms between baseline and treatment day 10, as measured by the PTSD Checklist for DSM-5. Repeated measures analysis of variance (ANOVA) will be performed using statistical software SPSS V.26.0. The significance level will be set at 0.05.

## Ethics and dissemination

Ethical approval has been obtained from the Ethics Committee of Xijing Hospital in Xi'an, China (KY20222176-X-1), and the trial has been registered on ClinicalTrials.gov. The findings of this trial will be disseminated at academic conferences or published in peer-reviewed scientific journals.

## Trial registration number

NCT05544110

## Strengths and limitations of this study

This is a randomized, double-blind, sham-controlled study to investigate the efficacy of MRI-guided rTMS for the treatment of PTSD.

The target of MRI-guided rTMS will be the sites that are most closely associated with the amygdala.

The efficacy will be monitored with an 8-week follow-up after the treatment.

A limitation of this study is that rTMS will be administered in combination with medication, making it difficult to verify the efficacy of rTMS as a monotherapy for PTSD.

## INTRODUCTION

Posttraumatic stress disorder (PTSD) is a severe mental disorder characterized by recurrent intrusive reexperiencing, nightmares, hyperarousal, avoidance behavior, and negative alterations in cognition or mood.(1) PTSD seriously impairs work ability and quality of life, which causes a heavy burden on families and society. The World Health Organization reported that the lifetime prevalence of PTSD reached 3.9% in a sample of 71,083 respondents, with nearly half of them exhibiting persistent symptoms.(2) Currently, the treatment for PTSD primarily includes medication and psychotherapy, which often require long-term application and may be accompanied by side effects. Moreover, a significant number of patients still do not experience relief after treatment,(3) and nearly 25% of PTSD patients did not achieve recovery within a 10-year period.(4)

Transcranial magnetic stimulation (TMS) is a non-invasive physical therapy that works by directly stimulating the cerebral cortex, thereby altering brain activity. Repetitive TMS (rTMS) is commonly used in clinical practice. High-frequency stimulation increases cortical excitability, while low-frequency stimulation inhibits excitability.(5) A number of studies have investigated the efficacy of rTMS for PTSD and preliminary findings indicate that targeting either the left or right dorsolateral prefrontal cortex (dlPFC) can partially alleviate PTSD symptoms.(6–8) High-frequency rTMS targeting the right dlPFC is considered a "Level B recommendation" for the treatment of PTSD, according to recent rTMS guidelines.(9) Besides, intermittent theta burst stimulation (iTBS) is a novel rTMS protocol in which high-frequency (50Hz) pulse clusters are delivered at 5Hz for 2 seconds, and the next cluster is repeated with an 8-second interval.(10) iTBS can produce a quicker and longer-lasting effect on the cortex in a shorter time than conventional rTMS patterns.(11) Philip *et al.*(12) applied iTBS to the right DLPFC in PTSD patients and found that partial clinical improvement can be observed after short-term interventions.

However, there is still a significant proportion of PTSD patients without remission of clinical symptoms after rTMS treatment, which may be primarily attributed to the stimulation target.(13,14) Most rTMS targets the dlPFC, which may not be a critical brain region in the pathogenesis of PTSD. Currently, numerous evidence supporting the notion that the amygdala plays a crucial role in the development and persistence of PTSD. The amygdala is located in the depths of the dorsomedial temporal cortex that determines the effects of threatening and rewarding stimuli on individual emotional or physiological responses.(15) PTSD patients exhibit a smaller volume in the amygdala (16,17) and often show hyperactivation in response to negative emotional stimuli as compared to the healthy group.(18,19) The amygdala is also significantly overactive in

1  
2  
3 PTSD patients, even when they are in a resting state.(20) Current research suggests that  
4 the abnormal activity of the amygdala contributes to the core symptoms of PTSD.(21)  
5 Furthermore, there is a positive correlation between the level of amygdala activity and  
6 the clinical severity of the disorder.(22–24) The clinical symptoms of PTSD patients  
7 can be significantly improved by inhibiting the function of the amygdala.(25) Therefore,  
8 the efficacy of rTMS for PTSD may be significantly enhanced by reducing the activity  
9 of the amygdala.  
10  
11  
12  
13

14 In addition, the stimulation coils frequently used in clinics can only affect cortical  
15 activity about 2-5.5 cm below the scalp, which results in rTMS failing to directly  
16 modulate the activity of the amygdala. However, the effects of rTMS are not only  
17 limited to the stimulation region but also induce subsequent changes in other brain  
18 regions that are closely connected to it.(26) MRI-guided rTMS can accurately affect  
19 deep brain regions by selecting stimulation targets based on functional  
20 connectivity.(27,28) This approach has been used to treat patients with depression and  
21 has significantly improved their clinical symptoms.(29) Sydnor et al.(30) found that  
22 selecting the most functionally relevant sites of the ventrolateral PFC (vlPFC) as TMS  
23 targets for the amygdala can significantly reduce amygdala activity. They also  
24 discovered that a higher density of white matter pathways connecting the vlPFC and  
25 amygdala is associated with greater changes in amygdala activity.  
26  
27  
28  
29  
30  
31

32 To summarize, it is reasonable to assume that the efficacy of rTMS for PTSD could  
33 be improved if these findings are used to guide the implementation of rTMS. Therefore,  
34 we plan to conduct a randomized controlled study aimed at validating the efficacy of  
35 MRI-guided rTMS in the treatment of PTSD by indirectly modulating the activity of  
36 the amygdala through structural and functional connectivity.  
37  
38  
39

### 40 **Study objective**

41 The amygdala is hyperactive in PTSD patients, and MRI-guided TMS can indirectly  
42 decrease amygdala activity through the functional and structural connectivity of each  
43 individual.(30) Presumably, MRI-guided rTMS would reduce amygdala activity in  
44 PTSD patients and significantly improve symptoms of PTSD. Therefore, in this  
45 randomized double-blind controlled study, we will analyze the degree of structural and  
46 functional connectivity of each participant, identifying the sites that are most closely  
47 linked to the amygdala as stimulation targets, and assess the effect of MRI-guided  
48 rTMS on clinical symptoms and brain activity.  
49  
50  
51  
52  
53

54 We hypothesized that patients who receive active stimulation will show more  
55 significant decreases in symptom severity after the intervention compared to patients  
56 who receive sham stimulation. We further hypothesize that active rTMS can  
57 significantly reduce amygdala activity, and that the extent of reduction is correlated  
58  
59  
60

with symptom improvement.

## METHODS AND ANALYSIS

### Study design

This is a single-center, patient and assessor blinded randomized controlled study. This study protocol is designed in accordance with the Standard Protocol Items for Randomized Trials (SPIRIT) statement. The process of this study is shown in Figure 1. PTSD patients will be randomly assigned to either the active rTMS group or the sham rTMS group using the block group randomization method. MRI scans will be performed on participants to identify target sites, then rTMS will be administered for 10 consecutive days. Participants will undergo additional MRI scans after the treatment to investigate changes in brain function before and after the treatment. Meanwhile, clinical symptom assessments will be conducted at baseline, treatment day 5, treatment day 10, and 2 weeks, 4 weeks, 8 weeks post-treatment to explore the improvement of PTSD symptoms by rTMS.

### Participants

PTSD patients will be recruited at the outpatient clinic of the First Affiliated Hospital of the Air Force Medical University, China, from March 2023 to June 2024. Recruitment information will also be made into a poster and disseminated through social media in order to recruit patients. These have been approved by the hospital Ethics Committee. Participants who meet the following inclusion and exclusion criteria are eligible for this study. At the screening, participants will be informed by the investigator about the study procedures, risks and benefits, and the voluntary nature of participation. Meanwhile, written informed consent will be obtained from all participants prior to their participation in the study.

#### Inclusion criteria

1. Between the ages of 18-65 years;
2. Meeting the criteria of the DSM-5 for PTSD, which will be assessed by two professional psychiatrists.
3. With a score greater than 33 on the PTSD Checklist for DSM-5 (PCL-5).
4. Not receive any medication or psychotherapy for PTSD before entering the study.

#### Exclusion criteria

1. Significant medical illnesses or diseases that may affect the central nervous system.
2. Abnormal EEG or MRI evidence of brain abnormalities.
3. Contraindications to MRI scans or TMS including metal or electronic implants, claustrophobia, etc.
4. Alcohol and drug abuse.

5. Strong suicidal ideation or a history of previous suicidal behavior.
6. Pregnancy, lactation, or planning pregnancy during the trial period.

### **Patient and public involvement**

Patients and/or the public were not involved in the design, or conduct, or reporting, or dissemination plans of this research.

### **Sample size**

Sample size is calculated using PASS software version 2021. We utilized the results of a previous randomized controlled study on PTSD conducted by our research team, which shares a similar study design with the current study. The effect size of PCL scale scores after rTMS treatment in the previous study is 0.8. The significance level is set at 0.05 (one-tailed test) and the statistical power is set at 80%. It has been calculated that 38 participants are needed. Assuming a dropout rate of 20%, the sample size is expanded to 48 participants (24 participants per group).

### **Allocation and Blinding**

Participants will be randomly assigned to either the active rTMS group or the sham rTMS group in a 1:1 ratio, following a randomization sequence. The sequence has been formulated by a specialized investigator (YM) before the trial, using block randomization with a block length of four.<sup>(31)</sup> The allocation details of each participant will be sequentially sealed in opaque envelopes. When participants enter the study, the researcher will open the envelopes in sequence and inform the therapist of the appropriate treatment.

Participants, their families, and the raters conducting the clinical assessments are blinded to the group assignment. Participant ID and subgroup information will be anonymized to ensure that the blinding remains in effect until the study is completed. If severe adverse events occur, unblinding will be performed after consultation with the principal investigator.

### **MRI data acquisition and identifying targets**

Neuroimaging data will be acquired at Xi'an YunYing Image Medical Diagnosis Center using a 3T uMR 780 scanner (Shanghai United Imaging Healthcare Co., Ltd., China). MRI data will include T1-weighted structural MRI, resting-state functional MRI, and diffusion tensor imaging sequences. The acquisition parameters are as follows: (1) T1-weighted structural MRI: slices = 200, repetition time = 7.24 ms, echo time = 3.10 ms, inversion time = 750 ms, field of view = 256 mm, flip angle = 10°; (2) resting-state functional MRI: slices = 8400, repetition time = 2000 ms, echo time = 30 ms, field of view = 224 mm, flip angle = 90°; (3) diffusion tensor imaging: slices = 2475, repetition time = 12676 ms, echo time = 88.6 ms, field of view = 224 mm, flip angle = 90°.



1  
2  
3  
4  
5  
6  
7  
8  
9  
10  
11  
12  
13  
14  
15  
16  
17  
18  
19  
20  
21  
22  
23  
24  
Based on the MRI data of each participant, we will identify sites in the right vIPFC that are structurally and functionally strongly associated with the right amygdala. These sites will be targeted for subsequent rTMS. The right hemisphere is chosen as the target for rTMS because previous studies have suggested that it may be more effective than the left hemisphere.(32) The target calculation process is as follows: first, the resting-state data will be preprocessed with reslicing and head motion correction, alignment, and Gaussian smoothing processing. Then, the right vIPFC will be divided into several subregions, and their subnucleolar concentrations, subnucleolar sizes, and functional connectivity coefficients with the right amygdala will be comprehensively analyzed to identify the sites that are functionally closely connected to the amygdala. Finally, the white matter fiber connections between these sites and the amygdala will be detected, and the optimal stimulation target will be selected by combining the functional connections and white matter fiber connections between them.

### 25 26 27 28 29 30 31 32 33 34 35 36 37 38 39 40 41 42 43 44 45 46 47 48 49 50 51 52 53 54 55 56 57 58 59 60

**Interventions**

The MRI-guided rTMS will be delivered by the Black Dolphin Transcranial Magnetic Robot (Spirit Dolphin, SLD-YXRJ-V1.0) from Xi'an Solide Brain Control Medical Technology Co., Ltd. The robot is equipped with a positioning navigation system based on neuroimaging, which allows it to manipulate the coil alignment and accurately place it on pre-explored targets. The position of the coil can be adjusted in real time during treatment to ensure that stimuli are consistently applied to the same target area. MRI-based positioning is currently the most accurate method for placing the TMS coil at the target site.(33) Preliminary results have shown that using this positioning generates greater clinical efficacy compared to traditional scalp measurements.(29)

A figure-of-eight coil will be used in the treatment of this study. Twenty sessions will be performed over 10 consecutive days, with two iTBS sessions per day at 50-minute intervals (intensity of 90% motor threshold, each containing 1800 pulses for 10 minutes). The 10-minute iTBS session has been shown to significantly improve symptoms of PTSD after up to 20 sessions. Our study will employ the iTBS protocol, which will be applied twice a day to expedite the treatment duration. The 50-minute interval is based on a previous iTBS study on iTBS, which suggests that intervals of 50 minutes or more can have a stronger cumulative effect on nerve fibers.(34,35) In the sham stimulation group, the coil will be turned 90° and placed in contact with the scalp, producing the same stimulation sound and some degree of scalp sensation. This approach does not induce significant changes in cortical activity and has been used in many randomized controlled studies of rTMS.(10,36) The treatment will be conducted by a trained technician in a separate treatment room. Participants will be prohibited from communicating with each other during the treatment intervals to prevent the

1 cohort effect. In addition, each participant will take paroxetine (20 mg/d) concurrently  
2 with rTMS treatment, in accordance with ethical guidelines. This is because paroxetine  
3 is currently the first-line medication for PTSD in clinical settings.(37) MRI and rTMS  
4 will be provided free of charge for participants.  
5  
6  
7  
8  
9

## 10 **Criteria for discontinuing interventions**

11 Participants will be discontinued from the study if (1) serious adverse events occur (e.g.,  
12 seizure and suicide); (2) the participant does not wish to continue; (3) the participant is  
13 unable to tolerate the discomfort produced by rTMS; and (4) serious violations of the  
14 treatment protocol occur, such as interruptions of treatment for 2 days or more.  
15  
16  
17

## 18 **Outcomes**

19 General information, including gender, age, type of trauma, and comorbidities, will be  
20 collected at baseline. Clinical symptoms will be monitored using self-rated and  
21 physician-rated clinical scales assessed at baseline, treatment day 5, treatment day 10,  
22 and 2 weeks, 4 weeks, 8 weeks after the end of treatment. MRI scans will also be  
23 performed at baseline and after the last session to observe the effects of rTMS on brain  
24 activity. In addition, any adverse events will be promptly recorded during the entire  
25 study period.  
26  
27  
28  
29

### 30 Primary outcome

- 31 ▶ The PTSD Checklist for DSM-5 (PCL-5) is a self-report scale commonly used to  
32 assess the severity of core PTSD symptoms. PCL-5 scores of 31 to 33 are optimal  
33 for efficiently diagnosing PTSD, with higher scores indicating more severe  
34 symptoms of PTSD.(38) The change from baseline to the 10-day treatment post of  
35 PCL-5 will be the primary measure as it can effectively reflect the effect of the  
36 intervention on PTSD symptoms.  
37  
38  
39  
40

### 41 Secondary outcomes

- 42 ▶ The change in PCL-5 scale total score at baseline compared to 2, 4, and 8 weeks  
43 after the end of treatment will be used to investigate the long-term efficacy of  
44 rTMS on symptoms of PTSD.  
45  
46 ▶ The 17-item Hamilton Depression Rating Scale (HAM-D-17) and the Beck  
47 Depression Inventory (BDI) are clinician- and self-rated scales used to assess  
48 depressive symptoms, respectively.(39,40) Higher total scores on these scales  
49 indicate more severe depressive symptoms. The change in total scores of the  
50 HAM-D-17 and BDI from baseline to each of the other time points will be used to  
51 assess the efficacy of rTMS on depressive symptoms.  
52  
53 ▶ The Hamilton Anxiety Scale (HAM-A) and the Zung Self-Rating Anxiety Scale  
54 (SAS) are commonly used in clinical practice to assess anxiety symptoms. In the  
55 present study, these scales will be used to assess the effectiveness of the  
56  
57  
58  
59  
60

1  
2  
3  
4 intervention in reducing anxiety symptoms.

- 5  
6  
7  
8  
9  
10  
11  
12  
13  
14  
15  
16  
17  
18  
19  
20  
21  
22  
23  
24  
25  
26  
27  
28  
29
- ▶ The Insomnia Severity Index (ISI) is a widely used questionnaire for screening insomnia. The measure is brief, consisting of only 7 items. Each item is scored from 0 to 4, with higher scores indicating greater sleep disturbance. In this study, the ISI will be used to assess the efficacy of the intervention on insomnia and sleep disturbances related to insomnia.
  - ▶ Resting-state functional magnetic resonance imaging reflects the spontaneous neural activity in different brain regions. Amplitude of the low-frequency fluctuation (ALFF) and regional homogeneity (ReHo) provide different perspectives for assessing the level of spontaneous activity in a single voxel of the brain.<sup>(41,42)</sup> In the present study, we will calculate the ALFF and ReHo values of the right amygdala before and after treatment, respectively, and compare their differences to explore the effect of rTMS on amygdala activity. The relationship between these changes and clinical outcomes will also be explored.
  - ▶ The incidence of adverse events during treatment and the retention rates in each group will be used to assess the safety and acceptability of the 10-day MRI-guided rTMS.

### 30 31 **Data collection and management**

32 Assessment data will be collected by two psychiatrists who are blinded to the allocation and not involved in patient treatment. Assessors have extensive work experience and will receive specific training to ensure consistency in assessment results among them. Participants will be available for phone interviews to facilitate the completion of follow-up visits.

33  
34  
35  
36  
37  
38  
39  
40  
41  
42  
43  
44  
45  
46  
47  
48  
49  
50  
51  
52  
53  
54  
55  
56  
57  
58  
59  
60

There is no data monitoring committee for this study. The Clinical Research Coordinator will assist in ensuring that data is entered completely and accurately. Personal information and clinical outcomes of participants will be initially stored in paper case report forms (CRFs), and on the last day of each week, the data will be electronically saved in an Excel database, which will be maintained on a separate computer at the research center. Data containing personally identifiable information will be stored in a separate Excel file, and each item will be assigned a specific code that will be used to refer to the participant in other databases. MRI scans of each participant will initially be stored on a CD, which will then be uploaded to the image database by the research staff. All paper documents and image CDs will be stored in a secure filing cabinet in the study center, while the computer and Excel database will be password-protected to ensure participant privacy. In addition, data from rTMS, including intensity thresholds, treatment progress, and any adverse events that occur during treatment, will be collected and independently stored by the therapist. This data

1  
2  
3 will then be added to the total Excel file after the study.  
4

### 5 **Participant safety**

6  
7 Prior to enrollment, participants with contraindications to MRI, such as metal implants  
8 in the body and claustrophobia, will be excluded. A specialized examiner will be  
9 responsible for conducting the MRI scans. They will also ensure that there are no  
10 relevant contraindications prior to the examination and provide earmuffs to mitigate the  
11 noise.  
12

13  
14 rTMS has been shown to be safe and well-tolerated in most clinical situations.  
15 Common adverse events include headaches and localized abnormal sensations, which  
16 are often mild and typically resolve within an hour after rTMS. However, rTMS has a  
17 low risk of inducing seizures, with an incidence rate of approximately 0.01-0.1%.  
18 Therefore, we will exclude participants who have a history of seizures or show  
19 abnormal EEG during screening. rTMS will be administered by experienced therapists  
20 to ensure that participants are promptly treated in case of adverse events. If any serious  
21 adverse events occur during the study, the participant will be taken by the investigator  
22 to either the emergency department or the specialist clinic. The sponsor is responsible  
23 for covering the cost of treatment and providing financial compensation to participants  
24 who suffer trial-related harm or death. Adverse events and study progress will be  
25 periodically reviewed by the Ethics Committee.  
26  
27  
28  
29  
30  
31  
32

### 33 **Statistical analysis**

34  
35 All data analysis will adhere to the intention-to-treat principle. Basic information and  
36 clinical scores of all participants will be analyzed using IBM SPSS Statistics for  
37 Windows version 26.0. Continuous variables will be expressed as means and standard  
38 deviations (SD), while categorical variables will be presented as frequencies and  
39 percentages. The independent samples t-test or chi-square test will be used to verify  
40 homogeneity between groups. One-way repeated measures ANOVA will be used to  
41 compare the outcome variables at different time points within each group. Two-way  
42 repeated measures ANOVA will be used to test the interaction effect of 'intervention'  
43 and 'time' on the outcome variables at different periods between the two groups.  
44 Multiple comparisons will then be performed using the Bonferroni test to identify  
45 specific significant differences. If there are significant differences in baseline  
46 characteristics, the ANCOVA model will be used to analyze the differences between  
47 groups. If there is missing data, it will be processed using the multiple imputation  
48 method.  
49  
50  
51  
52  
53  
54

55  
56 The MRI data before and after treatment will be processed and analyzed using the  
57 SPM12 software package in Matlab R2019b. The Restplus V1.2 toolbox will be used  
58 to preprocess and calculate the amplitude of low frequency fluctuation (ALFF) and  
59  
60

1  
2  
3 regional homogeneity (ReHo). Then, paired samples t-tests will be used to examine the  
4 differences before and after treatment within each group, and independent samples t-  
5 tests will be used to compare the differences after treatment between groups.  
6  
7

## 8 **ETHICS AND DISSEMINATION**

9

10 The study will be conducted in accordance with the Declaration of Helsinki and  
11 the study protocol. Ethical permission has been obtained from the Ethics Committee of  
12 the First Affiliated Hospital of Air Force Military Medical University (Grant No.  
13 KY20222176-X-1), and the study has been registered with ClinicalTrials.gov  
14 (NCT05544110). All participants will be informed of the study details and will be asked  
15 to sign a written informed consent before participating in the study.  
16  
17

18 The efficacy of the intervention will be disseminated at international and national  
19 academic conferences or published in peer-reviewed scientific journals.  
20  
21  
22

23 Contributors: All authors contributed to the initiation of this study. YCZ, MC, NT, HW were  
24 involved in the conception and design of the study. HW provided technical support for MRI  
25 analysis and rTMS. YCZ, YYZ, YM drafted the manuscript. ZP, NL, RL reviewed and revised  
26 the manuscript. All authors have read and approved the final manuscript.  
27  
28

29 Funding: This work is supported by National Natural Science Foundation of China (82330043).  
30

31 Competing interests: None declared.  
32

33 Data sharing: No additional data are available.  
34

35 Patient and public involvement: Patients and/or the public were not involved in the design, or  
36 conduct, or reporting, or dissemination plans of this research.  
37

38 Patient consent for publication: Not applicable.  
39

40 Provenance and peer review: Not commissioned; externally peer reviewed.  
41

42 Open access: This is an open access article distributed in accordance with the Creative  
43 Commons Attribution Non Commercial (CC BY-NC 4.0) license, which permits others to  
44 distribute, remix, adapt, build upon this work non-commercially, and license their derivative  
45 works on different terms, provided the original work is properly cited, appropriate credit is  
46 given, any changes made indicated, and the use is non-commercial.  
47 See: <http://creativecommons.org/licenses/by-nc/4.0/>.  
48  
49

## 50 **REFERENCES**

51

- 52 1 Shalev A, Liberzon I, Marmar C. Post-Traumatic Stress Disorder. *N Engl J Med*  
53 2017;376:2459-2469.
- 54 2 Rosellini AJ, Liu H, Petukhova MV, et al. Recovery from DSM-IV post-traumatic  
55 stress disorder in the WHO World Mental Health surveys. *Psychol Med*  
56 2018;48:437-450.  
57  
58  
59  
60

- 1
  - 2
  - 3
  - 4 Steenkamp MM, Litz BT, Hoge CW, et al. Psychotherapy for Military-Related PTSD: A Review of Randomized Clinical Trials. *JAMA* 2015;314:489-500.
  - 5
  - 6 Rosellini A J, Fayyad J, Koenen K C, et al. Patterns and predictors of the course of posttraumatic stress disorder[J]. *Trauma and Posttraumatic Stress Disorder: Global Perspectives from the WHO World Mental Health Surveys*. Cambridge University Press, New York, NY, 2018:240-252.
  - 7
  - 8
  - 9
  - 10
  - 11
  - 12
  - 13
  - 14
  - 15
  - 16
  - 17
  - 18
  - 19
  - 20
  - 21
  - 22
  - 23
  - 24
  - 25
  - 26
  - 27
  - 28
  - 29
  - 30
  - 31
  - 32
  - 33
  - 34
  - 35
  - 36
  - 37
  - 38
  - 39
  - 40
  - 41
  - 42
  - 43
  - 44
  - 45
  - 46
  - 47
  - 48
  - 49
  - 50
  - 51
  - 52
  - 53
  - 54
  - 55
  - 56
  - 57
  - 58
  - 59
  - 60
- 1
- 2
- 3
- 4
- 5
- 6
- 7
- 8
- 9
- 10
- 11
- 12
- 13
- 14
- 15
- 16
- 17
- 18
- 19
- 20
- 21
- 22
- 23
- 24
- 25
- 26
- 27
- 28
- 29
- 30
- 31
- 32
- 33
- 34
- 35
- 36
- 37
- 38
- 39
- 40
- 41
- 42
- 43
- 44
- 45
- 46
- 47
- 48
- 49
- 50
- 51
- 52
- 53
- 54
- 55
- 56
- 57
- 58
- 59
- 60



- 1  
2  
3  
4 Analysis of Magnetic Resonance Imaging Studies. *Neuropsychobiology*  
5 2022;81:257-264.
- 6  
7 17 Bromis K, Calem M, Reinders AATS, et al. Meta-Analysis of 89 Structural MRI  
8 Studies in Posttraumatic Stress Disorder and Comparison With Major Depressive  
9 Disorder. *Am J Psychiatry* 2018;175:989-998.
- 10  
11 18 Stevens JS, Kim YJ, Galatzer-Levy IR, et al. Amygdala Reactivity and Anterior  
12 Cingulate Habituation Predict Posttraumatic Stress Disorder Symptom  
13 Maintenance After Acute Civilian Trauma. *Biol Psychiatry* 2017;81:1023-1029.
- 14  
15 19 Stevens JS, Jovanovic T, Fani N, et al. Disrupted amygdala-prefrontal functional  
16 connectivity in civilian women with posttraumatic stress disorder. *J Psychiatr Res*  
17 2013;47:1469-1478.
- 18  
19  
20 20 Koch SB, van Zuiden M, Nawijn L, et al. ABERRANT RESTING-STATE BRAIN  
21 ACTIVITY IN POSTTRAUMATIC STRESS DISORDER: A META-ANALYSIS  
22 AND SYSTEMATIC REVIEW. *Depress Anxiety* 2016;33:592-605.
- 23  
24 21 Fenster RJ, Lebois LAM, Ressler KJ, et al. Brain circuit dysfunction in post-  
25 traumatic stress disorder: from mouse to man. *Nat Rev Neurosci* 2018;19:535-551.
- 26  
27 22 Sun D, Gold AL, Swanson CA, et al. Threat-induced anxiety during goal pursuit  
28 disrupts amygdala-prefrontal cortex connectivity in posttraumatic stress disorder.  
29 *Transl Psychiatry* 2020;10:61.
- 30  
31  
32 23 Liu T, Ke J, Qi R, et al. Altered functional connectivity of the amygdala and its  
33 subregions in typhoon-related post-traumatic stress disorder. *Brain Behav*  
34 2021;11:e01952.
- 35  
36 24 Mehta ND, Stevens JS, Li Z, et al. Inflammation, amygdala-ventromedial prefrontal  
37 functional connectivity and symptoms of anxiety and PTSD in African American  
38 women recruited from an inner-city hospital: Preliminary results. *Brain Behav*  
39 *Immun* 2022;105:122-130.
- 40  
41  
42 25 Bijanki KR, van Rooij SJH, Ely TD, et al. Case Series: Unilateral Amygdala  
43 Ablation Ameliorates Post-Traumatic Stress Disorder Symptoms and Biomarkers.  
44 *Neurosurgery* 2020;87:796-802.
- 45  
46  
47 26 Legrand M, Troubat R, Brizard B, et al. Prefrontal cortex rTMS reverses behavioral  
48 impairments and differentially activates c-Fos in a mouse model of post-traumatic  
49 stress disorder. *Brain Stimul* 2019;12:87-95.
- 50  
51 27 Oathes DJ, Zimmerman JP, Duprat R, et al. Resting fMRI-guided TMS results in  
52 subcortical and brain network modulation indexed by interleaved TMS/fMRI. *Exp*  
53 *Brain Res* 2021;239:1165-1178.
- 54  
55  
56 28 Raij T, Nummenmaa A, Marin MF, et al. Prefrontal Cortex Stimulation Enhances  
57 Fear Extinction Memory in Humans. *Biol Psychiatry* 2018;84:129-137.
- 58  
59 29 Cole EJ, Stimpson KH, Bentzley BS, et al. Stanford Accelerated Intelligent  
60

- 1  
2  
3 Neuromodulation Therapy for Treatment-Resistant Depression. *Am J Psychiatry*  
4 2020;177:716-726.  
5  
6  
7 30 Sydnor VJ, Cieslak M, Duprat R, et al. Cortical-subcortical structural connections  
8 support transcranial magnetic stimulation engagement of the amygdala. *Sci Adv*  
9 2022;8:eabn5803.  
10  
11 31 Lai D, Wang D, McGillivray M, et al. Assessing the quality of randomization  
12 methods in randomized control trials. *Healthc (Amst)* 2021;9:100570.  
13  
14 32 Kan RLD, Zhang BBB, Zhang JJQ, et al. Non-invasive brain stimulation for  
15 posttraumatic stress disorder: a systematic review and meta-analysis. *Transl*  
16 *Psychiatry* 2020;10:168.  
17  
18 33 Cash RFH, Weigand A, Zalesky A, et al. Using Brain Imaging to Improve Spatial  
19 Targeting of Transcranial Magnetic Stimulation for Depression. *Biol Psychiatry*  
20 2021;90:689-700.  
21  
22  
23 34 Lynch G, Kramár EA, Babayan AH, et al. Differences between synaptic plasticity  
24 thresholds result in new timing rules for maximizing long-term potentiation.  
25 *Neuropharmacology* 2013;64:27-36.  
26  
27 35 Smolen P, Zhang Y, Byrne JH. The right time to learn: mechanisms and  
28 optimization of spaced learning. *Nat Rev Neurosci* 2016;17:77-88.  
29  
30 36 Pan F, Mou T, Shao J, et al. Effects of neuronavigation-guided rTMS on serum  
31 BDNF, TrkB and VGF levels in depressive patients with suicidal ideation. *J Affect*  
32 *Disord* 2023;323:617-623.  
33  
34  
35 37 Abdallah CG, Averill LA, Akiki TJ, et al. The Neurobiology and Pharmacotherapy  
36 of Posttraumatic Stress Disorder. *Annu Rev Pharmacol Toxicol* 2019;59:171-189.  
37  
38 38 Bovin MJ, Marx BP, Weathers FW, et al. Psychometric properties of the PTSD  
39 Checklist for Diagnostic and Statistical Manual of Mental Disorders-Fifth Edition  
40 (PCL-5) in veterans. *Psychol Assess* 2016;28:1379-1391.  
41  
42 39 Furukawa TA, Reijnders M, Kishimoto S, et al. Translating the BDI and BDI-II  
43 into the HAMD and vice versa with equipercentile linking. *Epidemiol Psychiatr Sci*  
44 2019;29:e24.  
45  
46 40 Lin CH, Park C, McIntyre RS. Early improvement in HAMD-17 and HAMD-7  
47 scores predict response and remission in depressed patients treated with fluoxetine  
48 or electroconvulsive therapy. *J Affect Disord* 2019;253:154-161.  
49  
50 41 Zang YF, He Y, Zhu CZ, et al. Altered baseline brain activity in children with  
51 ADHD revealed by resting-state functional MRI. *Brain Dev* 2007;29:83-91.  
52  
53 42 Zang Y, Jiang T, Lu Y, et al. Regional homogeneity approach to fMRI data analysis.  
54 *Neuroimage* 2004;22:394-400.  
55  
56  
57  
58  
59  
60



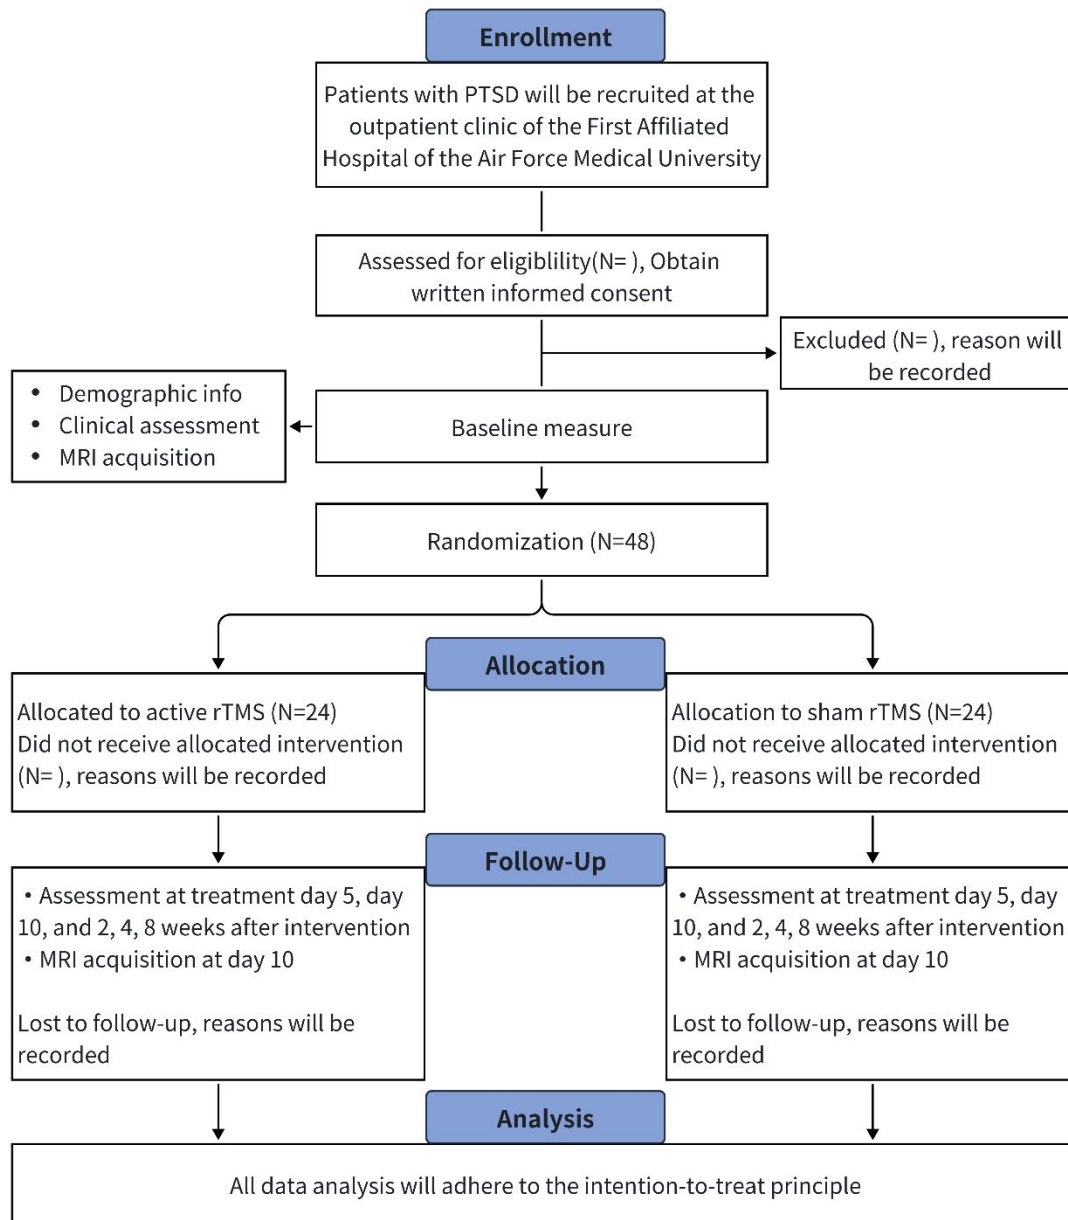

Figure 1 Flow chart of the study design. This flowchart illustrates the complete process from enrollment to intervention, follow-up, and data analysis. rTMS, repetitive transcranial magnetic stimulation.

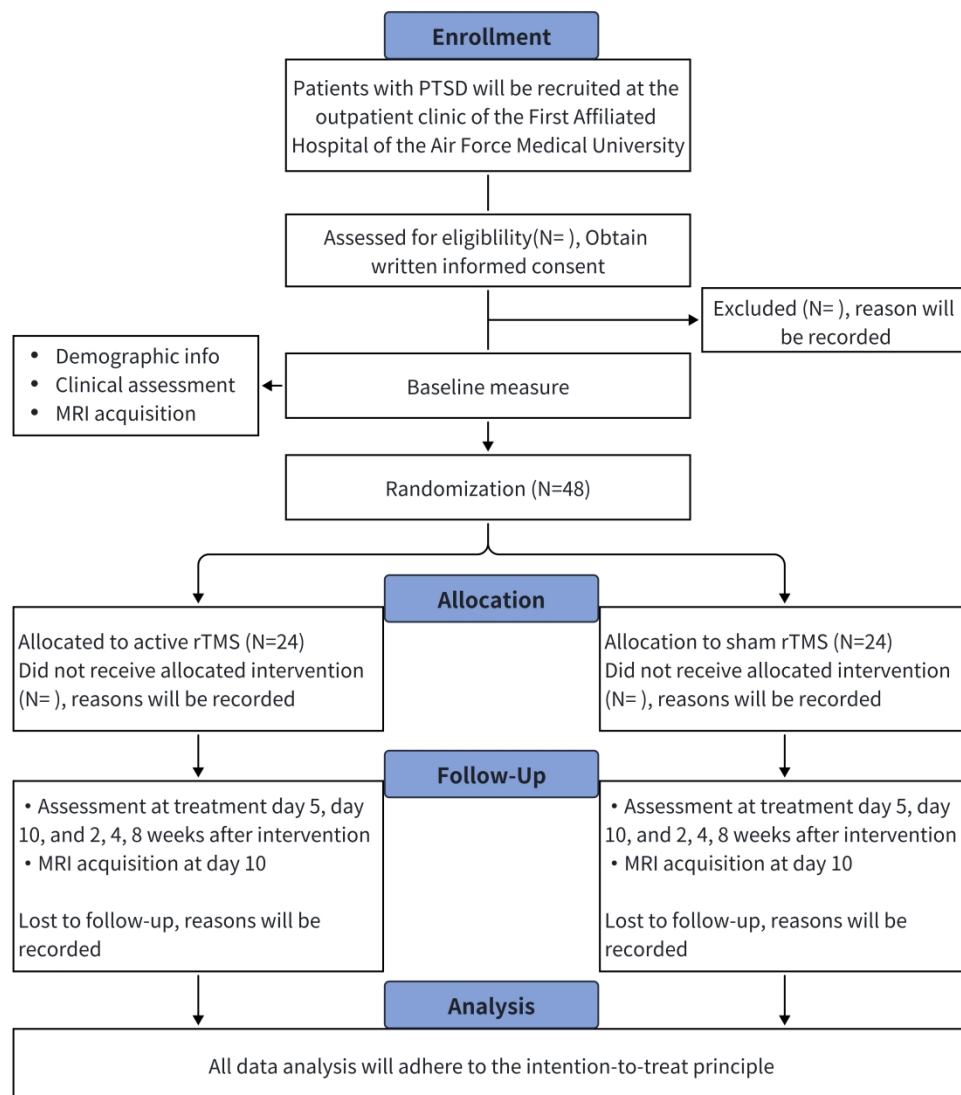

43 Figure 1 Flow chart of the study design. This flowchart illustrates the complete process from enrollment to  
44 intervention, follow-up, and data analysis. rTMS, repetitive transcranial magnetic stimulation.

45 1180x1335mm (96 x 96 DPI)

# Reporting checklist for protocol of a clinical trial.

Based on the SPIRIT guidelines.

## Instructions to authors

Complete this checklist by entering the page numbers from your manuscript where readers will find each of the items listed below.

Your article may not currently address all the items on the checklist. Please modify your text to include the missing information. If you are certain that an item does not apply, please write "n/a" and provide a short explanation.

Upload your completed checklist as an extra file when you submit to a journal.

In your methods section, say that you used the SPIRIT reporting guidelines, and cite them as:

Chan A-W, Tetzlaff JM, Gøtzsche PC, Altman DG, Mann H, Berlin J, Dickersin K, Hróbjartsson A, Schulz KF, Parulekar WR, Krleža-Jerić K, Laupacis A, Moher D. SPIRIT 2013 Explanation and Elaboration: Guidance for protocols of clinical trials. *BMJ*. 2013;346:e7586

|                                   | Reporting Item                                                                                                                  | Page Number |
|-----------------------------------|---------------------------------------------------------------------------------------------------------------------------------|-------------|
| <b>Administrative information</b> |                                                                                                                                 |             |
| Title                             | <a href="#">#1</a> Descriptive title identifying the study design, population, interventions, and, if applicable, trial acronym | Page 1      |
| Trial registration                | <a href="#">#2a</a> Trial identifier and registry name. If not yet registered,                                                  | Page 1      |

|    |                     |                                                                             |            |
|----|---------------------|-----------------------------------------------------------------------------|------------|
| 1  |                     | name of intended registry                                                   |            |
| 2  |                     |                                                                             |            |
| 3  |                     |                                                                             |            |
| 4  | Trial registration: | <a href="#">#2b</a> All items from the World Health Organization Trial      | Page 2     |
| 5  |                     |                                                                             |            |
| 6  | data set            | Registration Data Set                                                       |            |
| 7  |                     |                                                                             |            |
| 8  |                     |                                                                             |            |
| 9  | Protocol version    | <a href="#">#3</a> Date and version identifier                              |            |
| 10 |                     |                                                                             |            |
| 11 |                     |                                                                             |            |
| 12 | Funding             | <a href="#">#4</a> Sources and types of financial, material, and other      | Page 11    |
| 13 |                     |                                                                             |            |
| 14 |                     | support                                                                     |            |
| 15 |                     |                                                                             |            |
| 16 |                     |                                                                             |            |
| 17 | Roles and           | <a href="#">#5a</a> Names, affiliations, and roles of protocol contributors | Page 1     |
| 18 |                     |                                                                             |            |
| 19 | responsibilities:   |                                                                             |            |
| 20 |                     |                                                                             |            |
| 21 | contributorship     |                                                                             |            |
| 22 |                     |                                                                             |            |
| 23 |                     |                                                                             |            |
| 24 |                     |                                                                             |            |
| 25 | Roles and           | <a href="#">#5b</a> Name and contact information for the trial sponsor      | Page 1     |
| 26 |                     |                                                                             |            |
| 27 | responsibilities:   |                                                                             |            |
| 28 |                     |                                                                             |            |
| 29 | sponsor contact     |                                                                             |            |
| 30 |                     |                                                                             |            |
| 31 | information         |                                                                             |            |
| 32 |                     |                                                                             |            |
| 33 |                     |                                                                             |            |
| 34 |                     |                                                                             |            |
| 35 | Roles and           | <a href="#">#5c</a> Role of study sponsor and funders, if any, in study     | n/a (study |
| 36 |                     |                                                                             |            |
| 37 | responsibilities:   | design; collection, management, analysis, and                               | sponsor or |
| 38 |                     |                                                                             |            |
| 39 | sponsor and funder  | interpretation of data; writing of the report; and the                      | funders)   |
| 40 |                     |                                                                             |            |
| 41 |                     |                                                                             |            |
| 42 |                     | decision to submit the report for publication, including                    |            |
| 43 |                     |                                                                             |            |
| 44 |                     | whether they will have ultimate authority over any of                       |            |
| 45 |                     |                                                                             |            |
| 46 |                     | these activities                                                            |            |
| 47 |                     |                                                                             |            |
| 48 |                     |                                                                             |            |
| 49 | Roles and           | <a href="#">#5d</a> Composition, roles, and responsibilities of the         | Page 9     |
| 50 |                     |                                                                             |            |
| 51 | responsibilities:   | coordinating centre, steering committee, endpoint                           |            |
| 52 |                     |                                                                             |            |
| 53 | committees          | adjudication committee, data management team, and                           |            |
| 54 |                     |                                                                             |            |
| 55 |                     |                                                                             |            |
| 56 |                     | other individuals or groups overseeing the trial, if                        |            |
| 57 |                     |                                                                             |            |
| 58 |                     |                                                                             |            |
| 59 |                     |                                                                             |            |
| 60 |                     |                                                                             |            |

applicable (see Item 21a for data monitoring  
committee)

## Introduction

|                                                  |                     |                                                                                                                                                                                                            |                      |
|--------------------------------------------------|---------------------|------------------------------------------------------------------------------------------------------------------------------------------------------------------------------------------------------------|----------------------|
| Background and rationale                         | <a href="#">#6a</a> | Description of research question and justification for undertaking the trial, including summary of relevant studies (published and unpublished) examining benefits and harms for each intervention         | Page 4               |
| Background and rationale: choice of comparators  | <a href="#">#6b</a> | Explanation for choice of comparators                                                                                                                                                                      | Page 7               |
| Objectives                                       | <a href="#">#7</a>  | Specific objectives or hypotheses                                                                                                                                                                          | Page 4               |
| Trial design                                     | <a href="#">#8</a>  | Description of trial design including type of trial (eg, parallel group, crossover, factorial, single group), allocation ratio, and framework (eg, superiority, equivalence, non-inferiority, exploratory) | Page 5               |
| <b>Methods:</b>                                  |                     |                                                                                                                                                                                                            |                      |
| <b>Participants, interventions, and outcomes</b> |                     |                                                                                                                                                                                                            |                      |
| Study setting                                    | <a href="#">#9</a>  | Description of study settings (eg, community clinic, academic hospital) and list of countries where data will be collected. Reference to where list of study sites can be obtained                         | Page 5 and<br>Page 7 |

|                                                                                                                      |                                    |                      |                                                                                                                                                                                                                                                                                                                                                                                |                      |
|----------------------------------------------------------------------------------------------------------------------|------------------------------------|----------------------|--------------------------------------------------------------------------------------------------------------------------------------------------------------------------------------------------------------------------------------------------------------------------------------------------------------------------------------------------------------------------------|----------------------|
| 1<br>2<br>3<br>4<br>5<br>6<br>7<br>8<br>9                                                                            | Eligibility criteria               | <a href="#">#10</a>  | Inclusion and exclusion criteria for participants. If applicable, eligibility criteria for study centres and individuals who will perform the interventions (eg, surgeons, psychotherapists)                                                                                                                                                                                   | Page 5               |
| 10<br>11<br>12<br>13<br>14<br>15<br>16<br>17<br>18                                                                   | Interventions:<br>description      | <a href="#">#11a</a> | Interventions for each group with sufficient detail to allow replication, including how and when they will be administered                                                                                                                                                                                                                                                     | Page 7               |
| 19<br>20<br>21<br>22<br>23<br>24<br>25<br>26<br>27<br>28                                                             | Interventions:<br>modifications    | <a href="#">#11b</a> | Criteria for discontinuing or modifying allocated interventions for a given trial participant (eg, drug dose change in response to harms, participant request, or improving / worsening disease)                                                                                                                                                                               | Page 8               |
| 29<br>30<br>31<br>32<br>33<br>34<br>35                                                                               | Interventions:<br>adherence        | <a href="#">#11c</a> | Strategies to improve adherence to intervention protocols, and any procedures for monitoring adherence (eg, drug tablet return; laboratory tests)                                                                                                                                                                                                                              | Page 9               |
| 36<br>37<br>38<br>39<br>40                                                                                           | Interventions:<br>concomitant care | <a href="#">#11d</a> | Relevant concomitant care and interventions that are permitted or prohibited during the trial                                                                                                                                                                                                                                                                                  | Page 7               |
| 41<br>42<br>43<br>44<br>45<br>46<br>47<br>48<br>49<br>50<br>51<br>52<br>53<br>54<br>55<br>56<br>57<br>58<br>59<br>60 | Outcomes                           | <a href="#">#12</a>  | Primary, secondary, and other outcomes, including the specific measurement variable (eg, systolic blood pressure), analysis metric (eg, change from baseline, final value, time to event), method of aggregation (eg, median, proportion), and time point for each outcome. Explanation of the clinical relevance of chosen efficacy and harm outcomes is strongly recommended | Page 8 and<br>Page 9 |

|    |                           |                      |                                                          |         |
|----|---------------------------|----------------------|----------------------------------------------------------|---------|
| 1  | Participant timeline      | <a href="#">#13</a>  | Time schedule of enrolment, interventions (including     | Page 15 |
| 2  |                           |                      | any run-ins and washouts), assessments, and visits       |         |
| 3  |                           |                      | for participants. A schematic diagram is highly          |         |
| 4  |                           |                      | recommended (see Figure)                                 |         |
| 5  |                           |                      |                                                          |         |
| 6  |                           |                      |                                                          |         |
| 7  |                           |                      |                                                          |         |
| 8  |                           |                      |                                                          |         |
| 9  |                           |                      |                                                          |         |
| 10 |                           |                      |                                                          |         |
| 11 | Sample size               | <a href="#">#14</a>  | Estimated number of participants needed to achieve       | Page 6  |
| 12 |                           |                      | study objectives and how it was determined, including    |         |
| 13 |                           |                      | clinical and statistical assumptions supporting any      |         |
| 14 |                           |                      | sample size calculations                                 |         |
| 15 |                           |                      |                                                          |         |
| 16 |                           |                      |                                                          |         |
| 17 |                           |                      |                                                          |         |
| 18 |                           |                      |                                                          |         |
| 19 |                           |                      |                                                          |         |
| 20 |                           |                      |                                                          |         |
| 21 | Recruitment               | <a href="#">#15</a>  | Strategies for achieving adequate participant            | Page 5  |
| 22 |                           |                      | enrolment to reach target sample size                    |         |
| 23 |                           |                      |                                                          |         |
| 24 |                           |                      |                                                          |         |
| 25 |                           |                      |                                                          |         |
| 26 | <b>Methods:</b>           |                      |                                                          |         |
| 27 |                           |                      |                                                          |         |
| 28 | <b>Assignment of</b>      |                      |                                                          |         |
| 29 | <b>interventions (for</b> |                      |                                                          |         |
| 30 | <b>controlled trials)</b> |                      |                                                          |         |
| 31 |                           |                      |                                                          |         |
| 32 |                           |                      |                                                          |         |
| 33 |                           |                      |                                                          |         |
| 34 |                           |                      |                                                          |         |
| 35 |                           |                      |                                                          |         |
| 36 | Allocation: sequence      | <a href="#">#16a</a> | Method of generating the allocation sequence (eg,        | Page 6  |
| 37 | generation                |                      | computer-generated random numbers), and list of          |         |
| 38 |                           |                      | any factors for stratification. To reduce predictability |         |
| 39 |                           |                      | of a random sequence, details of any planned             |         |
| 40 |                           |                      | restriction (eg, blocking) should be provided in a       |         |
| 41 |                           |                      | separate document that is unavailable to those who       |         |
| 42 |                           |                      | enrol participants or assign interventions               |         |
| 43 |                           |                      |                                                          |         |
| 44 |                           |                      |                                                          |         |
| 45 |                           |                      |                                                          |         |
| 46 |                           |                      |                                                          |         |
| 47 |                           |                      |                                                          |         |
| 48 |                           |                      |                                                          |         |
| 49 |                           |                      |                                                          |         |
| 50 |                           |                      |                                                          |         |
| 51 |                           |                      |                                                          |         |
| 52 |                           |                      |                                                          |         |
| 53 | Allocation                | <a href="#">#16b</a> | Mechanism of implementing the allocation sequence        | Page 6  |
| 54 | concealment               |                      | (eg, central telephone; sequentially numbered,           |         |
| 55 | mechanism                 |                      | opaque, sealed envelopes), describing any steps to       |         |
| 56 |                           |                      |                                                          |         |
| 57 |                           |                      |                                                          |         |
| 58 |                           |                      |                                                          |         |
| 59 |                           |                      |                                                          |         |
| 60 |                           |                      |                                                          |         |

conceal the sequence until interventions are assigned

1  
2  
3  
4 Allocation: [#16c](#) Who will generate the allocation sequence, who will Page 6  
5  
6 implementation enrol participants, and who will assign participants to  
7  
8 interventions  
9

10  
11 Blinding (masking) [#17a](#) Who will be blinded after assignment to interventions Page 6  
12  
13 (eg, trial participants, care providers, outcome  
14  
15 assessors, data analysts), and how  
16  
17

18  
19 Blinding (masking): [#17b](#) If blinded, circumstances under which unblinding is Page 6  
20  
21 emergency permissible, and procedure for revealing a  
22  
23 unblinding participant's allocated intervention during the trial  
24  
25

26 **Methods: Data**  
27  
28 **collection,**  
29  
30 **management, and**  
31  
32 **analysis**  
33  
34  
35

36 Data collection plan [#18a](#) Plans for assessment and collection of outcome, Page 9  
37  
38 baseline, and other trial data, including any related  
39  
40 processes to promote data quality (eg, duplicate  
41  
42 measurements, training of assessors) and a  
43  
44 description of study instruments (eg, questionnaires,  
45  
46 laboratory tests) along with their reliability and validity,  
47  
48 if known. Reference to where data collection forms  
49  
50 can be found, if not in the protocol  
51  
52  
53  
54

55 Data collection plan: [#18b](#) Plans to promote participant retention and complete Page 9  
56  
57 retention follow-up, including list of any outcome data to be  
58  
59



1 collected for participants who discontinue or deviate  
2  
3 from intervention protocols  
4

5  
6 **Data management** [#19](#) Plans for data entry, coding, security, and storage, Page 9  
7  
8 including any related processes to promote data  
9  
10 quality (eg, double data entry; range checks for data  
11  
12 values). Reference to where details of data  
13  
14 management procedures can be found, if not in the  
15  
16 protocol  
17  
18

19  
20 **Statistics: outcomes** [#20a](#) Statistical methods for analysing primary and Page 10  
21  
22 secondary outcomes. Reference to where other  
23  
24 details of the statistical analysis plan can be found, if  
25  
26 not in the protocol  
27  
28

29  
30 **Statistics: additional** [#20b](#) Methods for any additional analyses (eg, subgroup Page 10  
31  
32 analyses and adjusted analyses)  
33  
34

35 **Statistics: analysis** [#20c](#) Definition of analysis population relating to protocol Page 10  
36  
37 population and non-adherence (eg, as randomised analysis), and  
38  
39 missing data any statistical methods to handle missing data (eg,  
40  
41 multiple imputation)  
42  
43  
44

## 45 **Methods: Monitoring**

46  
47  
48 **Data monitoring:** [#21a](#) Composition of data monitoring committee (DMC); Page 9  
49  
50 formal committee summary of its role and reporting structure; statement  
51  
52 of whether it is independent from the sponsor and  
53  
54 competing interests; and reference to where further  
55  
56 details about its charter can be found, if not in the  
57  
58

|    |                      |                                                                          |                 |
|----|----------------------|--------------------------------------------------------------------------|-----------------|
| 1  |                      | protocol. Alternatively, an explanation of why a DMC                     |                 |
| 2  |                      |                                                                          |                 |
| 3  |                      | is not needed                                                            |                 |
| 4  |                      |                                                                          |                 |
| 5  |                      |                                                                          |                 |
| 6  | Data monitoring:     | <a href="#">#21b</a> Description of any interim analyses and stopping    | n/a (No         |
| 7  |                      |                                                                          |                 |
| 8  | interim analysis     | guidelines, including who will have access to these                      | midterm         |
| 9  |                      |                                                                          |                 |
| 10 |                      | interim results and make the final decision to                           | analysis)       |
| 11 |                      |                                                                          |                 |
| 12 |                      | terminate the trial                                                      |                 |
| 13 |                      |                                                                          |                 |
| 14 |                      |                                                                          |                 |
| 15 | Harms                | <a href="#">#22</a> Plans for collecting, assessing, reporting, and      | Page 9 and      |
| 16 |                      |                                                                          |                 |
| 17 |                      | managing solicited and spontaneously reported                            | Page 10         |
| 18 |                      |                                                                          |                 |
| 19 |                      | adverse events and other unintended effects of trial                     |                 |
| 20 |                      |                                                                          |                 |
| 21 |                      | interventions or trial conduct                                           |                 |
| 22 |                      |                                                                          |                 |
| 23 |                      |                                                                          |                 |
| 24 |                      |                                                                          |                 |
| 25 | Auditing             | <a href="#">#23</a> Frequency and procedures for auditing trial conduct, | n/a (See Ethics |
| 26 |                      |                                                                          |                 |
| 27 |                      | if any, and whether the process will be independent                      | Committee       |
| 28 |                      |                                                                          |                 |
| 29 |                      | from investigators and the sponsor                                       | Review          |
| 30 |                      |                                                                          |                 |
| 31 |                      |                                                                          | Approval)       |
| 32 |                      |                                                                          |                 |
| 33 |                      |                                                                          |                 |
| 34 |                      |                                                                          |                 |
| 35 | <b>Ethics and</b>    |                                                                          |                 |
| 36 |                      |                                                                          |                 |
| 37 | <b>dissemination</b> |                                                                          |                 |
| 38 |                      |                                                                          |                 |
| 39 |                      |                                                                          |                 |
| 40 |                      |                                                                          |                 |
| 41 | Research ethics      | <a href="#">#24</a> Plans for seeking research ethics committee /        | Page 10         |
| 42 |                      |                                                                          |                 |
| 43 | approval             | institutional review board (REC / IRB) approval                          |                 |
| 44 |                      |                                                                          |                 |
| 45 |                      |                                                                          |                 |
| 46 | Protocol             | <a href="#">#25</a> Plans for communicating important protocol           | Page 11         |
| 47 |                      |                                                                          |                 |
| 48 | amendments           | modifications (eg, changes to eligibility criteria,                      |                 |
| 49 |                      |                                                                          |                 |
| 50 |                      | outcomes, analyses) to relevant parties (eg,                             |                 |
| 51 |                      |                                                                          |                 |
| 52 |                      | investigators, REC / IRBs, trial participants, trial                     |                 |
| 53 |                      |                                                                          |                 |
| 54 |                      | registries, journals, regulators)                                        |                 |
| 55 |                      |                                                                          |                 |
| 56 |                      |                                                                          |                 |
| 57 |                      |                                                                          |                 |
| 58 |                      |                                                                          |                 |
| 59 |                      |                                                                          |                 |
| 60 |                      |                                                                          |                 |

|    |                       |                      |                                                            |               |
|----|-----------------------|----------------------|------------------------------------------------------------|---------------|
| 1  | Consent or assent     | <a href="#">#26a</a> | Who will obtain informed consent or assent from            | Page 5        |
| 2  |                       |                      |                                                            |               |
| 3  |                       |                      |                                                            |               |
| 4  |                       |                      | potential trial participants or authorised surrogates,     |               |
| 5  |                       |                      |                                                            |               |
| 6  |                       |                      | and how (see Item 32)                                      |               |
| 7  |                       |                      |                                                            |               |
| 8  |                       |                      |                                                            |               |
| 9  | Consent or assent:    | <a href="#">#26b</a> | Additional consent provisions for collection and use of    | n/a (No plans |
| 10 |                       |                      |                                                            |               |
| 11 | ancillary studies     |                      | participant data and biological specimens in ancillary     | for other     |
| 12 |                       |                      |                                                            |               |
| 13 |                       |                      | studies, if applicable                                     | studies)      |
| 14 |                       |                      |                                                            |               |
| 15 |                       |                      |                                                            |               |
| 16 | Confidentiality       | <a href="#">#27</a>  | How personal information about potential and               | Page 9        |
| 17 |                       |                      |                                                            |               |
| 18 |                       |                      | enrolled participants will be collected, shared, and       |               |
| 19 |                       |                      |                                                            |               |
| 20 |                       |                      | maintained in order to protect confidentiality before,     |               |
| 21 |                       |                      |                                                            |               |
| 22 |                       |                      | during, and after the trial                                |               |
| 23 |                       |                      |                                                            |               |
| 24 |                       |                      |                                                            |               |
| 25 |                       |                      |                                                            |               |
| 26 | Declaration of        | <a href="#">#28</a>  | Financial and other competing interests for principal      | Page 11       |
| 27 |                       |                      |                                                            |               |
| 28 | interests             |                      | investigators for the overall trial and each study site    |               |
| 29 |                       |                      |                                                            |               |
| 30 |                       |                      |                                                            |               |
| 31 |                       |                      |                                                            |               |
| 32 | Data access           | <a href="#">#29</a>  | Statement of who will have access to the final trial       | Page 11       |
| 33 |                       |                      |                                                            |               |
| 34 |                       |                      | dataset, and disclosure of contractual agreements          |               |
| 35 |                       |                      |                                                            |               |
| 36 |                       |                      | that limit such access for investigators                   |               |
| 37 |                       |                      |                                                            |               |
| 38 |                       |                      |                                                            |               |
| 39 | Ancillary and post    | <a href="#">#30</a>  | Provisions, if any, for ancillary and post-trial care, and | Page 10       |
| 40 |                       |                      |                                                            |               |
| 41 | trial care            |                      | for compensation to those who suffer harm from trial       |               |
| 42 |                       |                      |                                                            |               |
| 43 |                       |                      | participation                                              |               |
| 44 |                       |                      |                                                            |               |
| 45 |                       |                      |                                                            |               |
| 46 |                       |                      |                                                            |               |
| 47 | Dissemination         | <a href="#">#31a</a> | Plans for investigators and sponsor to communicate         | Page 11       |
| 48 |                       |                      |                                                            |               |
| 49 | policy: trial results |                      | trial results to participants, healthcare professionals,   |               |
| 50 |                       |                      |                                                            |               |
| 51 |                       |                      | the public, and other relevant groups (eg, via             |               |
| 52 |                       |                      |                                                            |               |
| 53 |                       |                      | publication, reporting in results databases, or other      |               |
| 54 |                       |                      |                                                            |               |
| 55 |                       |                      | data sharing arrangements), including any publication      |               |
| 56 |                       |                      |                                                            |               |
| 57 |                       |                      |                                                            |               |
| 58 |                       |                      |                                                            |               |
| 59 |                       |                      |                                                            |               |
| 60 |                       |                      |                                                            |               |

restrictions

|    |                      |                      |                                                                                                                                                    |
|----|----------------------|----------------------|----------------------------------------------------------------------------------------------------------------------------------------------------|
| 1  |                      |                      |                                                                                                                                                    |
| 2  |                      |                      |                                                                                                                                                    |
| 3  |                      |                      |                                                                                                                                                    |
| 4  | Dissemination        | <a href="#">#31b</a> | Authorship eligibility guidelines and any intended use                                                                                             |
| 5  |                      |                      | Page 11                                                                                                                                            |
| 6  | policy: authorship   |                      | of professional writers                                                                                                                            |
| 7  |                      |                      |                                                                                                                                                    |
| 8  |                      |                      |                                                                                                                                                    |
| 9  | Dissemination        | <a href="#">#31c</a> | Plans, if any, for granting public access to the full                                                                                              |
| 10 |                      |                      | n/a (No plan)                                                                                                                                      |
| 11 | policy: reproducible |                      | protocol, participant-level dataset, and statistical code                                                                                          |
| 12 |                      |                      |                                                                                                                                                    |
| 13 | research             |                      |                                                                                                                                                    |
| 14 |                      |                      |                                                                                                                                                    |
| 15 |                      |                      |                                                                                                                                                    |
| 16 | <b>Appendices</b>    |                      |                                                                                                                                                    |
| 17 |                      |                      |                                                                                                                                                    |
| 18 |                      |                      |                                                                                                                                                    |
| 19 | Informed consent     | <a href="#">#32</a>  | Model consent form and other related documentation                                                                                                 |
| 20 |                      |                      | n/a (See                                                                                                                                           |
| 21 | materials            |                      | given to participants and authorised surrogates                                                                                                    |
| 22 |                      |                      | Informed                                                                                                                                           |
| 23 |                      |                      | Consent)                                                                                                                                           |
| 24 |                      |                      |                                                                                                                                                    |
| 25 |                      |                      |                                                                                                                                                    |
| 26 |                      |                      |                                                                                                                                                    |
| 27 | Biological           | <a href="#">#33</a>  | Plans for collection, laboratory evaluation, and                                                                                                   |
| 28 |                      |                      | n/a (No                                                                                                                                            |
| 29 | specimens            |                      | storage of biological specimens for genetic or                                                                                                     |
| 30 |                      |                      | biological                                                                                                                                         |
| 31 |                      |                      | molecular analysis in the current trial and for future                                                                                             |
| 32 |                      |                      | specimens will                                                                                                                                     |
| 33 |                      |                      | use in ancillary studies, if applicable                                                                                                            |
| 34 |                      |                      | be collected)                                                                                                                                      |
| 35 |                      |                      |                                                                                                                                                    |
| 36 |                      |                      |                                                                                                                                                    |
| 37 | None                 |                      | The SPIRIT Explanation and Elaboration paper is distributed under the terms of the Creative                                                        |
| 38 |                      |                      | Commons Attribution License CC-BY-NC. This checklist can be completed online using                                                                 |
| 39 |                      |                      |                                                                                                                                                    |
| 40 |                      |                      |                                                                                                                                                    |
| 41 |                      |                      |                                                                                                                                                    |
| 42 |                      |                      | <a href="https://www.goodreports.org/">https://www.goodreports.org/</a> , a tool made by the <a href="#">EQUATOR Network</a> in collaboration with |
| 43 |                      |                      |                                                                                                                                                    |
| 44 |                      |                      | <a href="#">Penelope.ai</a>                                                                                                                        |
| 45 |                      |                      |                                                                                                                                                    |
| 46 |                      |                      |                                                                                                                                                    |
| 47 |                      |                      |                                                                                                                                                    |
| 48 |                      |                      |                                                                                                                                                    |
| 49 |                      |                      |                                                                                                                                                    |
| 50 |                      |                      |                                                                                                                                                    |
| 51 |                      |                      |                                                                                                                                                    |
| 52 |                      |                      |                                                                                                                                                    |
| 53 |                      |                      |                                                                                                                                                    |
| 54 |                      |                      |                                                                                                                                                    |
| 55 |                      |                      |                                                                                                                                                    |
| 56 |                      |                      |                                                                                                                                                    |
| 57 |                      |                      |                                                                                                                                                    |
| 58 |                      |                      |                                                                                                                                                    |
| 59 |                      |                      |                                                                                                                                                    |
| 60 |                      |                      |                                                                                                                                                    |

# BMJ Open

## Efficacy of MRI-guided rTMS for posttraumatic stress disorder by modulating amygdala activity: study protocol for a randomized controlled trial

|                                 |                                                                                                                                                                                                                                                                                                                                                                                                                                                                                                                                                                                                                                                                                                                                                              |
|---------------------------------|--------------------------------------------------------------------------------------------------------------------------------------------------------------------------------------------------------------------------------------------------------------------------------------------------------------------------------------------------------------------------------------------------------------------------------------------------------------------------------------------------------------------------------------------------------------------------------------------------------------------------------------------------------------------------------------------------------------------------------------------------------------|
| Journal:                        | <i>BMJ Open</i>                                                                                                                                                                                                                                                                                                                                                                                                                                                                                                                                                                                                                                                                                                                                              |
| Manuscript ID                   | bmjopen-2023-081751.R1                                                                                                                                                                                                                                                                                                                                                                                                                                                                                                                                                                                                                                                                                                                                       |
| Article Type:                   | Protocol                                                                                                                                                                                                                                                                                                                                                                                                                                                                                                                                                                                                                                                                                                                                                     |
| Date Submitted by the Author:   | 10-May-2024                                                                                                                                                                                                                                                                                                                                                                                                                                                                                                                                                                                                                                                                                                                                                  |
| Complete List of Authors:       | Zhang, Yaochi; Xijing Hospital of Air Force Military Medical University, Psychiatry<br>Peng, Zhengwu; Xijing Hospital of Air Force Military Medical University, Psychiatry<br>Tang, Nailong; Xijing Hospital of Air Force Military Medical University, Psychiatry<br>Zhang, Yuyu; Xijing Hospital of Air Force Military Medical University<br>Liu, Nian; Xijing Hospital of Air Force Military Medical University,<br>Lv, Runxin; Xijing Hospital of Air Force Military Medical University<br>Meng, Yumeng; Xijing Hospital of Air Force Military Medical University, Psychiatry<br>Cai, Min; Xijing Hospital of Air Force Military Medical University<br>Wang, Hua-Ning; Xijing Hospital of Air Force Military Medical University, Department of Psychiatry |
| <b>Primary Subject Heading</b>: | Mental health                                                                                                                                                                                                                                                                                                                                                                                                                                                                                                                                                                                                                                                                                                                                                |
| Secondary Subject Heading:      | Neurology                                                                                                                                                                                                                                                                                                                                                                                                                                                                                                                                                                                                                                                                                                                                                    |
| Keywords:                       | Transcranial Magnetic Stimulation, PSYCHIATRY, NEUROLOGY                                                                                                                                                                                                                                                                                                                                                                                                                                                                                                                                                                                                                                                                                                     |
|                                 |                                                                                                                                                                                                                                                                                                                                                                                                                                                                                                                                                                                                                                                                                                                                                              |

SCHOLARONE™  
Manuscripts

1  
2  
3 **Title:** Efficacy of MRI-guided rTMS for posttraumatic stress disorder by modulating  
4 amygdala activity: study protocol for a randomized controlled trial  
5  
6  
7

8 **Corresponding author:** Dr Huaning Wang and Dr Min Cai

9 Mailing address: Department of Psychiatry, Xijing Hospital, The Fourth Military  
10 Medical University, Xi'an, Shaanxi, China

11 Email: xskzhu@fmmu.edu.cn, mincai8787@hotmail.com

12 Telephone: 0086-13609161341, 0086-15353508787  
13  
14  
15  
16

17 **All authors:**

18 Yaochi Zhang,<sup>1,2</sup> Zhengwu Peng,<sup>1</sup> Nailong Tang,<sup>1</sup> Yuyu Zhang,<sup>1</sup> Nian Liu,<sup>1</sup> Runxin  
19 Lv,<sup>1</sup> Yumeng Meng,<sup>1,2</sup> Min Cai,<sup>1</sup> Huaning Wang<sup>1</sup>

20 <sup>1</sup>Department of Psychiatry, Xijing Hospital, The Fourth Military Medical University,  
21 Xi'an, Shaanxi, China.  
22

23 <sup>2</sup>Xi'an Medical University, Xi'an, Shaanxi, China.  
24  
25  
26  
27

28 **Keywords:**

29 Posttraumatic Stress Disorder, Transcranial Magnetic Stimulation, amygdala,  
30 ventrolateral prefrontal cortex  
31  
32  
33

34 **Word count:** 3891  
35  
36  
37  
38  
39  
40  
41  
42  
43  
44  
45  
46  
47  
48  
49  
50  
51  
52  
53  
54  
55  
56  
57  
58  
59  
60

## ABSTRACT

### Introduction

Posttraumatic stress disorder (PTSD) is a prevalent and severe psychiatric disorder. Repetitive transcranial magnetic stimulation (rTMS) targeting the dorsolateral prefrontal cortex provides limited relief for symptoms of PTSD. This study will be conducted to validate the efficacy of MRI-guided rTMS in targeting the sites most closely associated with the amygdala for patients with PTSD. We hypothesize that the intervention will improve clinical symptoms by decreasing amygdala activity in patients.

### Methods and analysis

A randomized, double-blind, sham-controlled trial will be conducted. Forty-eight eligible patients with PTSD will be randomly assigned to receive either active or sham MRI-guided rTMS for 10 consecutive days after the initial MRI scans. MRI scans will be recollected at the end of the intervention. Clinical assessments will be performed at baseline, treatment day 5, treatment day 10, and 2 weeks, 4 weeks, 8 weeks after completion of the intervention to monitor changes in clinical symptoms. The primary assessment outcome is the change in PTSD symptoms between baseline and treatment day 10, as measured by the PTSD Checklist for DSM-5. Repeated measures analysis of variance (ANOVA) will be performed using statistical software SPSS V.26.0. The significance level will be set at 0.05.

### Ethics and dissemination

Ethical approval has been obtained from the Ethics Committee of Xijing Hospital in Xi'an, China (KY20222176-X-1), and the trial has been registered on ClinicalTrials.gov. The findings of this trial will be disseminated at academic conferences or published in peer-reviewed scientific journals.

### Trial registration number

NCT05544110

### Strengths and limitations of this study

This is a randomized controlled clinical trial to investigate the efficacy of MRI-guided rTMS for the treatment of PTSD.

Patients will be randomly assigned to the active or sham stimulation group while patients and assessors will be blinded to this condition.

The efficacy will be monitored with an 8-week follow-up after the treatment.

A limitation of this study is that rTMS will be administered in combination with medication, making it difficult to verify the efficacy of rTMS as a monotherapy for PTSD.

## INTRODUCTION

Posttraumatic stress disorder (PTSD) is a severe psychiatric disorder characterized by recurrent intrusive reexperiencing, nightmares, hyperarousal, avoidance behavior, and altered cognition or mood.(1) PTSD seriously impairs work ability and quality of life, which causes a heavy burden on families and society. The World Health Organization reported that the lifetime prevalence of PTSD reached 3.9% in a sample of 71,083 respondents, with nearly half of them exhibiting persistent symptoms.(2) Currently, the treatment for PTSD primarily includes medication and psychotherapy. However, a significant number of patients still do not get relief after treatment.(3) Additionally, almost 25% of patients with PTSD did not experience recovery within a 10-year period.(4)

Transcranial magnetic stimulation (TMS) is a non-invasive physical therapy by directly stimulating the cerebral cortex to alter brain activity. Repetitive TMS (rTMS) is commonly used in clinical practice. High-frequency stimulation increases cortical excitability, while low-frequency stimulation inhibits excitability.(5) A number of studies have investigated the efficacy of rTMS for PTSD and preliminary findings indicate that targeting either the left or right dorsolateral prefrontal cortex (dlPFC) can partially alleviate PTSD symptoms.(6–8) According to rTMS guidelines, high-frequency rTMS targeting the right dlPFC is considered a "Level B recommendation" for the treatment of PTSD.(9) Besides, intermittent theta burst stimulation (iTBS) is a novel rTMS protocol in which high-frequency (50Hz) pulse clusters are delivered at 5Hz for 2 seconds, and the next cluster is repeated with an 8-second interval.(10) iTBS can produce a quicker and longer-lasting effect on the cortex in a shorter time than conventional rTMS patterns.(11) Philip *et al.*(12) applied iTBS to the right DLPFC in patients with PTSD and found that partial clinical improvement can be observed after short-term interventions.

However, there is still a significant proportion of PTSD patients without remission of clinical symptoms after rTMS treatment, which may be primarily attributed to the stimulation target.(13,14) Most rTMS targets the dlPFC, which may not be a critical brain region in the pathogenesis of PTSD. Currently, numerous evidence supporting the notion that the amygdala plays a crucial role in the development and persistence of PTSD. The amygdala, located in the depths of the dorsomedial temporal cortex, is a brain region closely associated with fear conditioning.(15) Meanwhile, PTSD is also recognized as a disorder of dysfunction in fear conditioning, in which abnormalities in the amygdala are particularly prominent. PTSD patients exhibit a smaller volume in the amygdala (16,17) and often show hyperactivation in response to negative emotional stimuli as compared to the healthy group.(18,19) The amygdala is also significantly



1  
2  
3  
4 overactive, even in the resting state.(20) Current research suggests that hyperactivity of  
5 the amygdala is an important pathogenetic mechanism in PTSD and contributes to the  
6 core clinical symptoms.(21) Furthermore, there is a positive correlation between the  
7 level of amygdala activity and the clinical severity of the disorder.(22–24) The clinical  
8 symptoms of PTSD patients can be significantly improved by inhibiting the function of  
9 the amygdala.(25) Therefore, the efficacy of rTMS for PTSD may be significantly  
10 enhanced by reducing the activity of the amygdala.

11  
12  
13  
14 In addition, the stimulation coils frequently used in clinics can only affect cortical  
15 activity about 2-5.5 cm below the scalp, which results in rTMS failing to directly  
16 modulate the activity of the amygdala. However, the effects of rTMS are not only  
17 limited to the stimulation region but also induce subsequent changes in other brain  
18 regions that are closely connected to it.(26) MRI-guided rTMS can accurately affect  
19 deep brain regions by selecting stimulation targets based on functional  
20 connectivity.(27,28) The ventrolateral PFC (vlPFC) may be the target region of MRI-  
21 guided rTMS that can significantly affect the activity of the amygdala. The vlPFC has  
22 significant functional connectivity with the amygdala, which is enhanced in patients  
23 after effective treatment,(29,30) and it is also the only brain region in the PFC that can  
24 directly receive rTMS while having relatively more amygdala projections.(31,32)  
25 Sydnor et al.(33) found that selecting the most functionally relevant sites of the vlPFC  
26 as TMS targets for the amygdala can significantly reduce amygdala activity. They also  
27 discovered that a higher density of white matter pathways connecting the vlPFC and  
28 amygdala is associated with greater changes in amygdala activity.

29  
30  
31  
32 To summarize, the efficacy of rTMS for PTSD may be improved if these findings  
33 are utilized to inform the implementation of rTMS. Therefore, we plan to conduct a  
34 randomized controlled study aimed at validating the efficacy of MRI-guided rTMS in  
35 the treatment of PTSD by indirectly modulating the activity of the amygdala.

### 36 37 38 39 40 41 42 43 **Study objective**

44  
45 The amygdala is hyperactive in patients with PTSD, and MRI-guided rTMS can  
46 indirectly decrease amygdala activity through the functional and structural connectivity  
47 of each individual.(33) Presumably, MRI-guided rTMS in patients with PTSD would  
48 reduce amygdala activity and significantly improve symptoms of PTSD. Therefore, in  
49 this randomized double-blind controlled study, we will analyze the degree of structural  
50 and functional connectivity of each participant, identifying the sites that are most  
51 closely linked to the amygdala as stimulation targets, and assess the effect of MRI-  
52 guided rTMS on clinical symptoms and brain activity.

53  
54  
55  
56 We hypothesized that patients with PTSD who receive active stimulation will show  
57 more significant decreases in symptom severity after the intervention compared to  
58  
59  
60

1  
2  
3 patients who receive sham stimulation. We further hypothesize that active rTMS can  
4 significantly reduce amygdala activity, and that the extent of reduction is correlated  
5 with symptom improvement.  
6  
7

## 8 **METHODS AND ANALYSIS**

### 9 **Study design**

10  
11 This study protocol is designed in accordance with the Standard Protocol Items for  
12 Randomized Trials (SPIRIT) statement. The process of this study is shown in Figure 1.  
13 Patients with PTSD will be randomly assigned to either the active rTMS group or the  
14 sham rTMS group using the block group randomization method. MRI scans will be  
15 performed on participants to identify target sites, then rTMS will be administered for  
16 10 consecutive days. Participants will undergo additional MRI scans after the treatment  
17 to investigate changes in brain function before and after the treatment. Meanwhile,  
18 clinical symptom assessments will be conducted at baseline, treatment day 5, treatment  
19 day 10, and 2 weeks, 4 weeks, 8 weeks post-treatment to explore the improvement of  
20 PTSD symptoms by rTMS. This trial started in September 2023 and is expected to be  
21 completed in December 2024.  
22  
23

24 *Insert here Figure 1*

25 Figure 1 Flow chart of the study design

### 26 **Participants**

27 Patients with PTSD will be recruited at the outpatient clinic of the First Affiliated  
28 Hospital of the Air Force Medical University, China, from March 2023 to June 2024.  
29 Recruitment information will also be made into a poster and disseminated through  
30 social media in order to recruit patients. These have been approved by the hospital  
31 Ethics Committee. Participants who meet the following inclusion and exclusion criteria  
32 are eligible for this study. At the screening, participants will be informed by the  
33 investigator about the study procedures, risks and benefits, and the voluntary nature of  
34 participation. Meanwhile, written informed consent will be obtained from all  
35 participants prior to their participation in the study (online supplementary file 1).  
36  
37

#### 38 **Inclusion criteria**

- 39 1. Between the ages of 18-65 years;
- 40 2. Meeting the criteria of the DSM-5 for PTSD, which will be assessed by two  
41 professional psychiatrists.
- 42 3. With a score greater than 33 on the PTSD Checklist for DSM-5 (PCL-5).
- 43 4. Not receive any medication or psychotherapy for PTSD before entering the study.

#### 44 **Exclusion criteria**

- 45 1. Significant medical illnesses or diseases that may affect the central nervous system.

2. Abnormal EEG or MRI evidence of brain abnormalities.
3. Contraindications to MRI scans or TMS including metal or electronic implants, claustrophobia, etc.
4. Alcohol and drug abuse.
5. Strong suicidal ideation or a history of previous suicidal behavior.
6. Pregnancy, lactation, or planning pregnancy during the trial period.

### **Patient and public involvement**

Patients and the public were not involved in the design of the study.

### **Sample size**

Sample size is calculated using PASS software version 2021. We utilized the results of a previous randomized controlled study on PTSD conducted by our research team, which shares a similar study design with the current study.<sup>(34)</sup> The effect size of PCL scale scores after rTMS treatment in the previous study is 0.82. The significance level is set at 0.05 (two-tailed test) and the statistical power is set at 80%. It has been calculated that 38 participants are needed. Assuming a dropout rate of 20%, the sample size is expanded to 48 participants (24 participants per group).

### **Allocation and Blinding**

Participants will be randomly assigned to either the active rTMS group or the sham rTMS group in a 1:1 ratio, following a randomization sequence. The sequence has been formulated by a specialized investigator (YM) before the trial, using block randomization with a block length of four.<sup>(35)</sup> The allocation details of each participant will be sequentially sealed in opaque envelopes. When participants enter the study, the researcher will open the envelopes in sequence and inform the therapist of the appropriate treatment.

Participants, their families, and the raters conducting the clinical assessments are blinded to the group assignment. Participant ID and subgroup information will be anonymized to ensure that the blinding remains in effect until the study is completed. If severe adverse events occur, unblinding will be performed after consultation with the principal investigator.

### **MRI data acquisition and identifying targets**

Neuroimaging data will be acquired at Xi'an YunYing Image Medical Diagnosis Center using a 3T uMR 780 scanner (Shanghai United Imaging Healthcare Co., Ltd., China). MRI data will include T1-weighted structural MRI, resting-state functional MRI, and diffusion tensor imaging sequences. The acquisition parameters are as follows: (1) T1-weighted structural MRI: thickness = 1 mm, slices = 200, repetition time = 7.24 ms, echo time = 3.10 ms, inversion time = 750 ms, field of view = 256 × 256 mm<sup>2</sup>, inversion

1  
2  
3  
4  
5  
6  
7  
8  
9  
10  
11  
12  
13  
time = 750 ms, flip angle =  $10^\circ$ , voxel size =  $1 \times 1 \times 1 \text{ mm}^3$ ; (2) resting-state functional MRI: thickness = 4 mm, slices = 8400, repetition time = 2000 ms, echo time = 30 ms, field of view =  $224 \times 224 \text{ mm}^2$ , flip angle =  $90^\circ$ , voxel size =  $3.5 \times 3.5 \times 4.0 \text{ mm}^3$ ; (3) diffusion tensor imaging: thickness = 2 mm, slices = 2475, repetition time = 12676 ms, echo time = 88.6 ms, field of view =  $224 \times 224 \text{ mm}^2$ , flip angle =  $90^\circ$ , voxel size =  $2 \times 2 \times 2 \text{ mm}^3$ , b-value =  $1000 \text{ s/mm}^2$ . During the scan, participants will be asked to close their eyes, relax, not think intentionally, and not fall asleep.

14  
15  
16  
17  
18  
19  
20  
21  
22  
23  
24  
25  
26  
27  
28  
29  
30  
31  
32  
33  
Based on the MRI data of each participant, we will identify sites in the right vIPFC that are structurally and functionally strongly associated with the right amygdala. These sites will be targeted for subsequent rTMS. The right hemisphere is chosen as the target for rTMS because previous studies have suggested that it may be more effective than the left hemisphere.(36) The target calculation process is as follows: first, the resting-state data will be preprocessed with reslicing and head motion correction, alignment, and Gaussian smoothing processing. Then, the right vIPFC will be divided into several subregions, and their subnucleolar concentrations, subnucleolar sizes, and functional connectivity coefficients with the right amygdala will be comprehensively analyzed to identify the sites that are functionally closely connected to the amygdala. Finally, the white matter fiber connections between these sites and the amygdala will be detected, and the optimal stimulation target will be selected by combining the functional connections and white matter fiber connections between them.

### 34 35 36 37 38 39 40 41 42 43 44 45 46 47 48 49 50 51 52 53 54 55 56 57 58 59 60

## Interventions

The MRI-guided rTMS will be delivered by the Black Dolphin Transcranial Magnetic Robot (Spirit Dolphin, SLD-YXRJ-V1.0) from Xi'an Solide Brain Control Medical Technology Co. which is equipped with a figure-of-eight coil (Yingchi Tech, Shenzhen, China). The robot is equipped with a positioning navigation system based on neuroimaging, which allows it to manipulate the coil alignment and accurately place it on pre-explored targets. The position of the coil can be adjusted in real time during treatment to ensure that stimuli are consistently applied to the same target area. MRI-based positioning is currently the most accurate method for placing the TMS coil at the target site.(37) Preliminary results have shown that using this positioning generates greater clinical efficacy compared to traditional scalp measurements.(38)

A figure-of-eight coil will be used in the treatment of this study. Twenty sessions will be performed over 10 consecutive days, with two iTBS sessions per day at 50-minute intervals (intensity of 90% motor threshold, each containing 1800 pulses for 10 minutes). The 10-minute iTBS session has been shown to significantly improve symptoms of PTSD after up to 20 sessions. Our study will employ the iTBS protocol, which will be applied twice a day to expedite the treatment duration. The 50-minute

1  
2  
3 interval is based on a previous iTBS study on iTBS, which suggests that intervals of 50  
4 minutes or more can have a stronger cumulative effect on nerve fibers.(39,40) In the  
5 sham stimulation group, the coil will be turned 90° and placed in contact with the scalp,  
6 producing the same stimulation sound and some degree of scalp sensation. This  
7 approach does not induce significant changes in cortical activity and has been used in  
8 many randomized controlled studies of rTMS.(10,41) The treatment will be conducted  
9 by a trained technician in a separate treatment room. Participants will be prohibited  
10 from communicating with each other during the treatment intervals to prevent the  
11 cohort effect. In addition, each participant will take paroxetine (20 mg/d) concurrently  
12 with rTMS treatment, in accordance with ethical guidelines. This is because paroxetine  
13 is currently the first-line medication for PTSD in clinical settings.(42) MRI and rTMS  
14 will be provided free of charge for participants.

## 22 **Outcomes**

23 General information, including gender, age, type of trauma, and comorbidities, will be  
24 collected at baseline. Clinical symptoms will be monitored using self-rated and  
25 physician-rated clinical scales assessed at baseline, treatment day 5, treatment day 5,  
26 and 2 weeks, 4 weeks, 8 weeks after the end of treatment. MRI scans will also be  
27 performed at baseline and after the last session to observe the effects of rTMS on brain  
28 activity in patients with PTSD. In addition, any adverse events will be promptly  
29 recorded during the entire study period.

### 34 Primary outcome

- 35  
36 ▶ The PTSD Checklist for DSM-5 (PCL-5) is a self-report scale commonly used to  
37 assess the severity of core PTSD symptoms. PCL-5 scores of 31 to 33 are optimal  
38 for efficiently diagnosing PTSD, with higher scores indicating more severe  
39 symptoms of PTSD.(43) The change from baseline to the 10-day treatment post of  
40 PCL-5 will be the primary measure as it can effectively reflect the effect of the  
41 intervention on PTSD symptoms.

### 45 Secondary outcomes

- 46 ▶ The change in PCL-5 scale total score at baseline compared to 2, 4, and 8 weeks  
47 after the end of treatment will be used to investigate the long-term efficacy of  
48 rTMS on symptoms of PTSD.
- 49 ▶ The 17-item Hamilton Depression Rating Scale (HAM-D-17) and the Beck  
50 Depression Inventory (BDI) are clinician- and self-rated scales used to assess  
51 depressive symptoms, respectively.(44,45) Higher total scores on these scales  
52 indicate more severe depressive symptoms. The change in total scores of the  
53 HAM-D-17 and BDI from baseline to each of the other time points will be used to  
54 assess the efficacy of rTMS on depressive symptoms.

- ▶ The Hamilton Anxiety Scale (HAMA) and the Zung Self-Rating Anxiety Scale (SAS) are commonly used in clinical practice to assess anxiety symptoms. In the present study, these scales will be used to assess the effectiveness of the intervention in reducing anxiety symptoms.
- ▶ The Insomnia Severity Index (ISI) is a widely used questionnaire for screening insomnia. The measure is brief, consisting of only 7 items. Each item is scored from 0 to 4, with higher scores indicating greater sleep disturbance. In this study, the ISI will be used to assess the efficacy of the intervention on insomnia and sleep disturbances related to insomnia.
- ▶ Resting-state functional magnetic resonance imaging reflects the spontaneous neural activity in different brain regions. Amplitude of the low-frequency fluctuation (ALFF) and regional homogeneity (ReHo) provide different perspectives for assessing the level of spontaneous activity in a single voxel of the brain.(46,47) In the present study, we will calculate the ALFF and ReHo values of the right amygdala before and after treatment, respectively, and compare their differences to explore the effect of rTMS on amygdala activity. The relationship between these changes and clinical outcomes will also be explored.
- ▶ The incidence of adverse events during treatment and the retention rates in each group will be used to assess the safety and acceptability of the 10-day MRI-guided rTMS.

### **Data collection and management**

Assessment data will be collected by two psychiatrists who are blinded to the allocation and not involved in patient treatment. Assessors have extensive work experience and will receive specific training to ensure consistency in assessment results among them. Participants will be available for phone interviews to facilitate the completion of follow-up visits.

Personal information and clinical outcomes of participants will be initially stored in paper case report forms (CRFs), and on the last day of each week, the data will be electronically saved in an Excel database, which will be maintained on a separate computer at the research center. Data containing personally identifiable information will be stored in a separate Excel file, and each item will be assigned a specific code that will be used to refer to the participant in other databases. MRI scans will be performed at a specialized imaging facility. MRI scans of each participant will initially be stored on a CD, which will then be uploaded to the image database by the research staff. All paper documents and image CDs will be stored in a secure filing cabinet in the study center, while the computer and Excel database will be password-protected to ensure participant privacy. In addition, data from rTMS, including intensity thresholds,



1  
2  
3 treatment progress, and any adverse events that occur during treatment, will be  
4 collected and independently stored by the therapist. This data will then be added to the  
5 total Excel file after the study.  
6  
7

### 8 **Participant safety**

9  
10 Prior to enrollment, participants with contraindications to MRI, such as metal implants  
11 in the body and claustrophobia, will be excluded. A specialized examiner will be  
12 responsible for conducting the MRI scans. They will also ensure that there are no  
13 relevant contraindications prior to the examination and provide earmuffs to mitigate the  
14 noise.  
15  
16

17  
18 rTMS has been shown to be safe and well-tolerated in most clinical situations.  
19 Common adverse events include headaches and localized abnormal sensations, which  
20 are often mild and typically resolve within an hour after rTMS. However, rTMS has a  
21 low risk of inducing seizures, with an incidence rate of approximately 0.01-0.1%.  
22 Therefore, we will exclude participants who have a history of seizures or show  
23 abnormal EEG during screening. rTMS will be administered by experienced therapists  
24 to ensure that participants are promptly treated in case of adverse events. If any serious  
25 adverse events occur during the study, the participant will be taken by the investigator  
26 to either the emergency department or the specialist clinic. The sponsor is responsible  
27 for covering the cost of treatment and providing financial compensation to participants  
28 who suffer trial-related harm or death. Adverse events and study progress will be  
29 periodically reviewed by the Ethics Committee.  
30  
31  
32  
33  
34  
35

36 Participants will be discontinued from the study if (1) serious adverse events occur  
37 (e.g., seizure and suicide); (2) the participant does not wish to continue; (3) the  
38 participant is unable to tolerate the discomfort produced by rTMS; and (4) serious  
39 violations of the treatment protocol occur, such as interruptions of treatment for 2 days  
40 or more.  
41  
42  
43

### 44 **Statistical analysis**

45 All data analysis will adhere to the intention-to-treat principle. Basic information and  
46 clinical scores of all participants will be analyzed using IBM SPSS Statistics for  
47 Windows version 26.0. Continuous variables will be expressed as means and standard  
48 deviations (SD), while categorical variables will be presented as frequencies and  
49 percentages. The independent samples t-test or chi-square test will be used to verify  
50 homogeneity between groups. One-way repeated measures ANOVA will be used to  
51 compare the outcome variables at different time points within each group. Two-way  
52 repeated measures ANOVA will be used to test the interaction effect of 'intervention'  
53 and 'time' on the outcome variables at different periods between the two groups.  
54 Multiple comparisons will then be performed using the Bonferroni test to identify  
55  
56  
57  
58  
59  
60

1  
2  
3  
4 specific significant differences. If there are significant differences in baseline  
5 characteristics, the ANCOVA model will be used to analyze the differences between  
6 groups. If there is missing data, it will be processed using the multiple imputation  
7 method.  
8

9  
10 The MRI data before and after treatment will be processed and analyzed using the  
11 SPM12 software package in Matlab R2019b. The Restplus V1.2 toolbox will be used  
12 to preprocess and calculate the amplitude of low frequency fluctuation (ALFF) and  
13 regional homogeneity (ReHo). Then, paired samples t-tests will be used to examine the  
14 differences before and after treatment within each group, and independent samples t-  
15 tests will be used to compare the differences after treatment between groups.  
16  
17

## 18 19 **ETHICS AND DISSEMINATION**

20  
21 The study will be conducted in accordance with the Declaration of Helsinki and the  
22 study protocol. Ethical permission has been obtained from the Ethics Committee of the  
23 First Affiliated Hospital of Air Force Military Medical University (Grant No.  
24 KY20222176-X-1), and the study has been registered with ClinicalTrials.gov. All  
25 participants will be informed of the study details and will be asked to sign a written  
26 informed consent before participating in the study.  
27  
28

29  
30 The efficacy of the intervention will be disseminated at international and national  
31 academic conferences or published in peer-reviewed scientific journals.  
32  
33

## 34 35 **STRENGTHS AND LIMITATIONS**

36 The present trial has the following strengths: First, to our knowledge, this study is the  
37 first randomized double-blind sham-controlled study using MRI-guided rTMS for the  
38 treatment of PTSD; Second, the target selected in this study is vIPFC, a region currently  
39 not intervened in TMS clinical treatment. Therefore, our results may enrich target  
40 selection for future TMS treatment; Third, the present study aims to inhibit amygdala  
41 activity, and neuroimages will be acquired before and after treatment, which will  
42 probably reveal PTSD-related therapeutic mechanisms. This study also has some  
43 limitations: first, due to ethical requirements, patients will take the medication while  
44 receiving TMS, which may mask the differences in efficacy between the two groups.  
45 However, it usually takes about a month for medications to begin to show efficacy in  
46 treating PTSD, so the influence of medication on the primary outcome may have been  
47 limited. Second, the lack of objective observations to measure changes in PTSD  
48 symptoms is also a limitation of this study.  
49  
50

51  
52 Contributors: All authors contributed to the initiation of this study. YCZ, MC, NT, HW were  
53 involved in the conception and design of the study. HW provided technical support for MRI  
54 analysis and rTMS. YCZ, YYZ, YM drafted the manuscript. ZP, NL, RL reviewed and revised  
55  
56  
57  
58  
59  
60



1  
2  
3  
4 the manuscript. All authors have read and approved the final manuscript.

5 Funding: This work is supported by National Natural Science Foundation of China (82330043).

6 Competing interests: None declared.

7  
8 Patient and public involvement: Patients and/or the public were not involved in the design, or  
9 conduct, or reporting, or dissemination plans of this research.

10 Patient consent for publication: Not applicable.

11 Provenance and peer review: Not commissioned; externally peer reviewed.

12  
13 Open access: This is an open access article distributed in accordance with the Creative  
14 Commons Attribution Non Commercial (CC BY-NC 4.0) license, which permits others to  
15 distribute, remix, adapt, build upon this work non-commercially, and license their derivative  
16 works on different terms, provided the original work is properly cited, appropriate credit is  
17 given, any changes made indicated, and the use is non-commercial.  
18 See: <http://creativecommons.org/licenses/by-nc/4.0/>.

## 23 REFERENCES

- 24 1 Shalev A, Liberzon I, Marmar C. Post-Traumatic Stress Disorder. *N Engl J Med*  
25 2017;376:2459-2469.
- 26 2 Rosellini AJ, Liu H, Petukhova MV, et al. Recovery from DSM-IV post-traumatic  
27 stress disorder in the WHO World Mental Health surveys. *Psychol Med*  
28 2018;48:437-450.
- 29 3 Steenkamp MM, Litz BT, Hoge CW, et al. Psychotherapy for Military-Related  
30 PTSD: A Review of Randomized Clinical Trials. *JAMA* 2015;314:489-500.
- 31 4 Rosellini A J, Fayyad J, Koenen K C, et al. Patterns and predictors of the course of  
32 posttraumatic stress disorder[J]. *Trauma and Posttraumatic Stress Disorder: Global  
33 Perspectives from the WHO World Mental Health Surveys*. Cambridge University  
34 Press, New York, NY, 2018:240-252.
- 35 5 Jannati A, Oberman LM, Rotenberg A, et al. Assessing the mechanisms of brain  
36 plasticity by transcranial magnetic stimulation. *Neuropsychopharmacology*  
37 2023;48:191-208.
- 38 6 Ahmadizadeh MJ, Rezaei M. Unilateral right and bilateral dorsolateral prefrontal  
39 cortex transcranial magnetic stimulation in treatment post-traumatic stress disorder:  
40 A randomized controlled study. *Brain Res Bull* 2018;140:334-340.
- 41 7 Woodside DB, Colton P, Lam E, et al. Dorsomedial prefrontal cortex repetitive  
42 transcranial magnetic stimulation treatment of posttraumatic stress disorder in  
43 eating disorders: An open-label case series. *Int J Eat Disord* 2017;50:1231-1234.
- 44 8 Watts BV, Landon B, Groft A, et al. A sham controlled study of repetitive  
45 transcranial magnetic stimulation for posttraumatic stress disorder. *Brain Stimul*  
46 2012;5:38-43.

- 1
- 2
- 3
- 4 9 Lefaucheur JP, Aleman A, Baeken C, et al. Evidence-based guidelines on the
- 5 therapeutic use of repetitive transcranial magnetic stimulation (rTMS): An update
- 6 (2014-2018) [published correction appears in Clin Neurophysiol. 2020
- 7 May;131(5):1168-1169]. Clin Neurophysiol 2020;131:474-528.
- 8
- 9
- 10 10 Blumberger DM, Vila-Rodriguez F, Thorpe KE, et al. Effectiveness of theta burst
- 11 versus high-frequency repetitive transcranial magnetic stimulation in patients with
- 12 depression (THREE-D): a randomised non-inferiority trial. Lancet 2018;391:1683-
- 13 1692.
- 14
- 15 11 Huang YZ, Edwards MJ, Rounis E, et al. Theta burst stimulation of the human
- 16 motor cortex. Neuron 2005;45:201-206.
- 17
- 18 12 Philip NS, Barredo J, Aiken E, et al. Theta-Burst Transcranial Magnetic
- 19 Stimulation for Posttraumatic Stress Disorder. Am J Psychiatry 2019;176:939-948.
- 20
- 21 13 Harris A, Reece J. Transcranial magnetic stimulation as a treatment for
- 22 posttraumatic stress disorder: A meta-analysis. J Affect Disord 2021;289:55-65.
- 23
- 24 14 van Rooij SJH, Sippel LM, McDonald WM, et al. Defining focal brain stimulation
- 25 targets for PTSD using neuroimaging. Depress Anxiety 2021;10.1002/da.23159.
- 26
- 27 15 Janak PH, Tye KM. From circuits to behaviour in the amygdala. Nature
- 28 2015;517:284-292.
- 29
- 30 16 Del Casale A, Ferracuti S, Barbetti AS, et al. Grey Matter Volume Reductions of
- 31 the Left Hippocampus and Amygdala in PTSD: A Coordinate-Based Meta-
- 32 Analysis of Magnetic Resonance Imaging Studies. Neuropsychobiology
- 33 2022;81:257-264.
- 34
- 35 17 Bromis K, Calem M, Reinders AATS, et al. Meta-Analysis of 89 Structural MRI
- 36 Studies in Posttraumatic Stress Disorder and Comparison With Major Depressive
- 37 Disorder. Am J Psychiatry 2018;175:989-998.
- 38
- 39 18 Stevens JS, Kim YJ, Galatzer-Levy IR, et al. Amygdala Reactivity and Anterior
- 40 Cingulate Habituation Predict Posttraumatic Stress Disorder Symptom
- 41 Maintenance After Acute Civilian Trauma. Biol Psychiatry 2017;81:1023-1029.
- 42
- 43 19 Stevens JS, Jovanovic T, Fani N, et al. Disrupted amygdala-prefrontal functional
- 44 connectivity in civilian women with posttraumatic stress disorder. J Psychiatr Res
- 45 2013;47:1469-1478.
- 46
- 47 20 Koch SB, van Zuiden M, Nawijn L, et al. ABERRANT RESTING-STATE BRAIN
- 48 ACTIVITY IN POSTTRAUMATIC STRESS DISORDER: A META-ANALYSIS
- 49 AND SYSTEMATIC REVIEW. Depress Anxiety 2016;33:592-605.
- 50
- 51 21 Fenster RJ, Lebois LAM, Ressler KJ, et al. Brain circuit dysfunction in post-
- 52 traumatic stress disorder: from mouse to man. Nat Rev Neurosci 2018;19:535-551.
- 53
- 54 22 Sun D, Gold AL, Swanson CA, et al. Threat-induced anxiety during goal pursuit
- 55 disrupts amygdala-prefrontal cortex connectivity in posttraumatic stress disorder.
- 56
- 57
- 58
- 59
- 60

- 1  
2  
3  
4  
5  
6  
7  
8  
9  
10  
11  
12  
13  
14  
15  
16  
17  
18  
19  
20  
21  
22  
23  
24  
25  
26  
27  
28  
29  
30  
31  
32  
33  
34  
35  
36  
37  
38  
39  
40  
41  
42  
43  
44  
45  
46  
47  
48  
49  
50  
51  
52  
53  
54  
55  
56  
57  
58  
59  
60
- Transl Psychiatry 2020;10:61.
- 23 Liu T, Ke J, Qi R, et al. Altered functional connectivity of the amygdala and its subregions in typhoon-related post-traumatic stress disorder. *Brain Behav* 2021;11:e01952.
- 24 Mehta ND, Stevens JS, Li Z, et al. Inflammation, amygdala-ventromedial prefrontal functional connectivity and symptoms of anxiety and PTSD in African American women recruited from an inner-city hospital: Preliminary results. *Brain Behav Immun* 2022;105:122-130.
- 25 Bijanki KR, van Rooij SJH, Ely TD, et al. Case Series: Unilateral Amygdala Ablation Ameliorates Post-Traumatic Stress Disorder Symptoms and Biomarkers. *Neurosurgery* 2020;87:796-802.
- 26 Legrand M, Troubat R, Brizard B, et al. Prefrontal cortex rTMS reverses behavioral impairments and differentially activates c-Fos in a mouse model of post-traumatic stress disorder. *Brain Stimul* 2019;12:87-95.
- 27 Oathes DJ, Zimmerman JP, Duprat R, et al. Resting fMRI-guided TMS results in subcortical and brain network modulation indexed by interleaved TMS/fMRI. *Exp Brain Res* 2021;239:1165-1178.
- 28 Raij T, Nummenmaa A, Marin MF, et al. Prefrontal Cortex Stimulation Enhances Fear Extinction Memory in Humans. *Biol Psychiatry* 2018;84:129-137.
- 29 Silvers JA, Insel C, Powers A, et al. vLPFC-vmPFC-Amygdala Interactions Underlie Age-Related Differences in Cognitive Regulation of Emotion. *Cereb Cortex* 2017;27:3502-3514.
- 30 Lu L, Mills JA, Li H, et al. Acute Neurofunctional Effects of Escitalopram in Pediatric Anxiety: A Double-Blind, Placebo-Controlled Trial. *J Am Acad Child Adolesc Psychiatry* 2021;60:1309-1318.
- 31 Ghashghaei HT, Hilgetag CC, Barbas H. Sequence of information processing for emotions based on the anatomic dialogue between prefrontal cortex and amygdala. *Neuroimage* 2007;34:905-923.
- 32 Ray RD, Zald DH. Anatomical insights into the interaction of emotion and cognition in the prefrontal cortex. *Neurosci Biobehav Rev* 2012;36:479-501.
- 33 Sydnor VJ, Cieslak M, Duprat R, et al. Cortical-subcortical structural connections support transcranial magnetic stimulation engagement of the amygdala. *Sci Adv* 2022;8:eabn5803.
- 34 Zhou P, Zhang Y, Tan QR. Effect of repetitive transcranial magnetic stimulation (rTMS) combined with paroxetine in the treatment of posttraumatic stress disorder. *J Psychiatry (Chinese ed.)* 2016;29:89-92.
- 35 Lai D, Wang D, McGillivray M, et al. Assessing the quality of randomization methods in randomized control trials. *Healthc (Amst)* 2021;9:100570.

- 1  
2  
3  
4 36 Kan RLD, Zhang BBB, Zhang JJQ, et al. Non-invasive brain stimulation for  
5 posttraumatic stress disorder: a systematic review and meta-analysis. *Transl*  
6 *Psychiatry* 2020;10:168.  
7  
8 37 Cash RFH, Weigand A, Zalesky A, et al. Using Brain Imaging to Improve Spatial  
9 Targeting of Transcranial Magnetic Stimulation for Depression. *Biol Psychiatry*  
10 2021;90:689-700.  
11  
12 38 Cole EJ, Stimpson KH, Bentzley BS, et al. Stanford Accelerated Intelligent  
13 Neuromodulation Therapy for Treatment-Resistant Depression. *Am J Psychiatry*  
14 2020;177:716-726.  
15  
16 39 Lynch G, Kramár EA, Babayan AH, et al. Differences between synaptic plasticity  
17 thresholds result in new timing rules for maximizing long-term potentiation.  
18 *Neuropharmacology* 2013;64:27-36.  
19  
20 40 Smolen P, Zhang Y, Byrne JH. The right time to learn: mechanisms and  
21 optimization of spaced learning. *Nat Rev Neurosci* 2016;17:77-88.  
22  
23 41 Pan F, Mou T, Shao J, et al. Effects of neuronavigation-guided rTMS on serum  
24 BDNF, TrkB and VGF levels in depressive patients with suicidal ideation. *J Affect*  
25 *Disord* 2023;323:617-623.  
26  
27 42 Abdallah CG, Averill LA, Akiki TJ, et al. The Neurobiology and Pharmacotherapy  
28 of Posttraumatic Stress Disorder. *Annu Rev Pharmacol Toxicol* 2019;59:171-189.  
29  
30 43 Bovin MJ, Marx BP, Weathers FW, et al. Psychometric properties of the PTSD  
31 Checklist for Diagnostic and Statistical Manual of Mental Disorders-Fifth Edition  
32 (PCL-5) in veterans. *Psychol Assess* 2016;28:1379-1391.  
33  
34 44 Furukawa TA, Reijnders M, Kishimoto S, et al. Translating the BDI and BDI-II  
35 into the HAMD and vice versa with equipercentile linking. *Epidemiol Psychiatr Sci*  
36 2019;29:e24.  
37  
38 45 Lin CH, Park C, McIntyre RS. Early improvement in HAMD-17 and HAMD-7  
39 scores predict response and remission in depressed patients treated with fluoxetine  
40 or electroconvulsive therapy. *J Affect Disord* 2019;253:154-161.  
41  
42 46 Zang YF, He Y, Zhu CZ, et al. Altered baseline brain activity in children with  
43 ADHD revealed by resting-state functional MRI. *Brain Dev* 2007;29:83-91.  
44  
45 47 Zang Y, Jiang T, Lu Y, et al. Regional homogeneity approach to fMRI data analysis.  
46 *Neuroimage* 2004;22:394-400.  
47  
48  
49  
50  
51  
52  
53  
54  
55  
56  
57  
58  
59  
60

1  
2  
3  
4  
5  
6  
7  
8  
9  
10  
11  
12  
13  
14  
15  
16  
17  
18  
19  
20  
21  
22  
23  
24  
25  
26  
27  
28  
29  
30  
31  
32  
33  
34  
35  
36  
37  
38  
39  
40  
41  
42  
43  
44  
45  
46  
47  
48  
49  
50  
51  
52  
53  
54  
55  
56  
57  
58  
59  
60

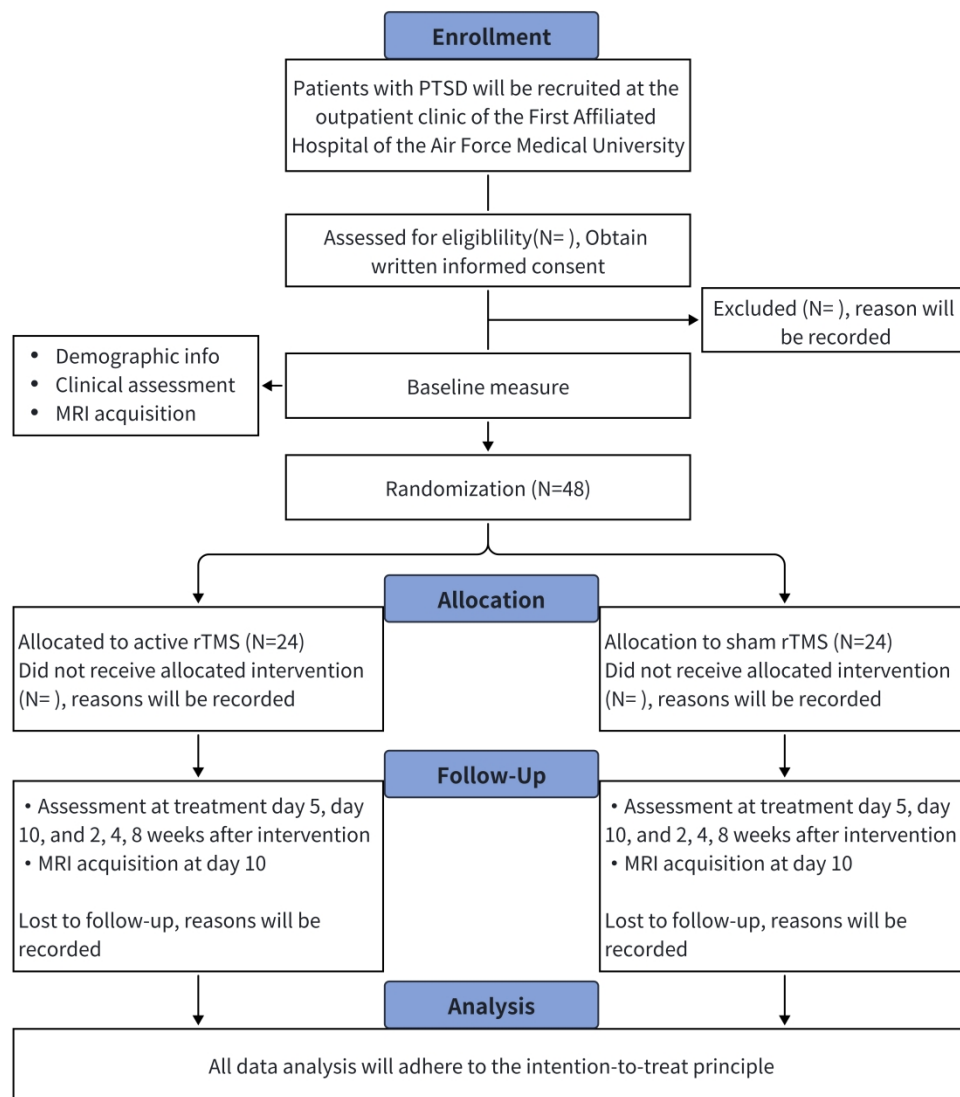

Figure 1 Flow chart of the study design. This flowchart illustrates the complete process from enrollment to intervention, follow-up, and data analysis. rTMS, repetitive transcranial magnetic stimulation.

1180x1335mm (96 x 96 DPI)

## Informed Consent Form

You are invited to participate in the study "Efficacy of MRI-guided rTMS for posttraumatic stress disorder by modulating amygdala activity: study protocol for a randomized controlled trial". This study will be conducted in the First Affiliated Hospital of the Air Force Medical University and a total of 48 participants will be voluntarily invited to participate. Ethical approval for this study has been obtained from the Medical Ethics Committee of the First Affiliated Hospital of the Air Force Medical University (approval No. KY20222176-X-1).

### 1. Why do we carry out this study?

PTSD is a psychiatric disorder that occurs after an individual has experienced severe psychological trauma, and is characterized by intrusive experiences, hypervigilance, avoidance symptoms, and negative cognitive and emotional changes. PTSD severely impairs the ability of the patient to live and work, and creates a serious burden on the family and society. Currently, the first line of treatment for PTSD is medication and psychotherapy, but there are still a significant number of patients who do not achieve remission after treatment. Repetitive transcranial magnetic stimulation (rTMS) is an emerging treatment that is expected to improve the remission rate of PTSD patients. This study will be conducted to validate the efficacy of MRI-guided rTMS for patients with PTSD.

### 2. What do you need to do if you participate in this study?

If you agree to participate in this study, the information of your age, sex, traumatic experiences characteristics (time of occurrence, number and type) and treatment will be collected before treatment commencement. and you will be performed an MRI scan and clinical scale evaluation. Then you will be assigned to either the rTMS or sham stimulation group. You will receive the rTMS or sham stimulation twice a day for about 10 minutes each. Each treatment will be separated by 50 min for 10 consecutive days. During this period, you will be introduced to conventional medication at the same time, with the main therapeutic drug being paroxetine.

1  
2  
3  
4 Outcome data on efficacy of safety will be collected at baseline, treatment day 5, treatment  
5 day 10, and 2 weeks, 4 weeks, 8 weeks after completion of intervention.  
6  
7  
8

### 9 **3. What are the treatment options available?**

- 10  
11 (1) Medication, including SSRIs, SNRIs, anxiolytics, and sleeping pills;  
12  
13 (2) Psychotherapy, including cognitive-behavioral therapy and exposure therapy.  
14  
15

### 16 **4. Who should not participate in this study?**

17  
18 If you have any of the following conditions, you are not eligible to participate in this  
19 study.  
20  
21

- 22  
23 (1) Significant medical illness or diseases that may affect the central nervous system;  
24  
25 (2) Abnormal EEG or MRI evidence of brain;  
26  
27 (3) Contraindications to the MRI scans or TMS, such as metal or electronic implants,  
28 claustrophobia, etc;  
29  
30 (4) Alcohol and drug abuse;  
31  
32 (5) Strong suicidal ideation or previous suicidal behavior;  
33  
34 (6) Pregnancy, lactation, or planning pregnancy during the trial period.  
35  
36  
37  
38

### 39 **5. What are the risks of participating in this study?**

40  
41 rTMS is a safe, easily tolerated method of physical therapy, and numerous studies have found  
42 rTMS to be highly safe when applied to patients with PTSD. Common adverse events include  
43 mild headache, dizziness, and localized sensory abnormalities. These discomforts often  
44 resolve on their own within an hour or so after treatment. Moreover, as the patient adapts to  
45 the treatment, these discomforts do not recur. However, there is a small chance that rTMS  
46 will induce seizures. This is likely to occur in patients with epilepsy or in people with  
47 abnormal EEGs. Therefore, before you are introduced to rTMS, we will exclude participants  
48 with seizures as well as abnormal EEG during screening to avoid this situation. rTMS will be  
49 administered by experienced therapists to ensure that participants are treated promptly in case  
50 of adverse events. If serious adverse events occur during the study, the participant will be  
51 taken by the investigator to the emergency department or the specialist clinic.  
52  
53  
54  
55  
56  
57  
58  
59  
60



1  
2  
3  
4  
5  
6  
7  
8  
9  
10  
11  
12  
13  
14

## **6. What are the possible benefits of participating in this study?**

Your condition may improve if you participate in this study. This study will help us to clarify whether MRI-guided rTMS has a clinically significant effect on PTSD, so that we may be able to develop more effective treatments for other patients with PTSD..

15  
16  
17  
18  
19  
20  
21  
22  
23  
24  
25  
26  
27  
28

## **7. Do I need to pay any fees to participate in this study?**

There is no payment required to participate in the study. Incentive of reducing other therapy fees will be provided for you. The medication you receive will be charged at the usual outpatient rate. You will be provided corresponding treatment and compensation in accordance with relevant national regulations in case of any injury occurred in relation to the study.

29  
30  
31  
32  
33  
34  
35  
36  
37  
38  
39  
40  
41  
42  
43  
44

## **8. Is personal information confidential?**

All your information will be kept confidential in the First Affiliated Hospital of the Air Force Medical University. Your medical record will only be accessible to the researchers, research authorities and the ethics committee. Your personal identity will not be disclosed in any public report of this study. We will make every effort to protect the personal data privacy of each participant in accordance to the requirements of the ethics committee and legal authorities.

45  
46  
47  
48  
49  
50  
51  
52  
53  
54  
55  
56  
57  
58  
59  
60

## **9. Do I have to participate in the study?**

Participation in this study is completely voluntary. You may refuse to participate or withdraw from the study at any stage of the study without being subjected to any discrimination or retaliation. Your rights to appropriate medical treatment will not be affected. If you decide to withdraw from the study, please contact your doctor for proper treatment.



1  
2  
3  
4 **Participant declaration:** I have read the above information of this study. The researcher has  
5 fully explained to me the purpose, the procedures, the possible risks and potential benefits of  
6 this study, and answered all my relevant questions.  
7  
8

9 I volunteer to participate in the study  
10

11 **I agree**  **or refuse**  to use my research data for research other than this study.  
12  
13

14  
15 Name of participant in block letters:  
16

17 Participant 's signature: Date:  
18

19 Phone number of participant:  
20  
21  
22

23 Legal representative name in Block letters: (if applicable)  
24

25 Relationship with participant:  
26

27 Legal representative signature: Date:  
28

29 Reasons for signing by legal representative:  
30  
31  
32

33 Name of Witness in block letters: (if applicable)  
34

35 Signature of witness: Date:  
36

37 Reasons for signing by witnesses:  
38  
39  
40

41 **Physician statement:** I have explained the study details to the participant and provided  
42 him/her with an original signed informed consent form. I confirm that I have explained  
43 this study to the subject in detail, especially the ethical principles and information of  
44 risks and benefits, fee and compensation, injury and compensation, voluntariness and  
45 confidentiality that may arise from participating in the study.  
46  
47  
48

49 Doctor's signature: Date:  
50

51 Contact number of the doctor:  
52  
53  
54  
55

56 **Biomedical Ethics Committee of the First Affiliated Hospital of the Air Force Medical**  
57 **University**  
58

59 **Contact number: 029-84771794**  
60

# Reporting checklist for protocol of a clinical trial.

Based on the SPIRIT guidelines.

## Instructions to authors

Complete this checklist by entering the page numbers from your manuscript where readers will find each of the items listed below.

Your article may not currently address all the items on the checklist. Please modify your text to include the missing information. If you are certain that an item does not apply, please write "n/a" and provide a short explanation.

Upload your completed checklist as an extra file when you submit to a journal.

In your methods section, say that you used the SPIRIT reporting guidelines, and cite them as:

Chan A-W, Tetzlaff JM, Gøtzsche PC, Altman DG, Mann H, Berlin J, Dickersin K, Hróbjartsson A, Schulz KF, Parulekar WR, Krleža-Jerić K, Laupacis A, Moher D. SPIRIT 2013 Explanation and Elaboration: Guidance for protocols of clinical trials. *BMJ*. 2013;346:e7586

|                                   | Reporting Item                                                                                                                  | Page Number |
|-----------------------------------|---------------------------------------------------------------------------------------------------------------------------------|-------------|
| <b>Administrative information</b> |                                                                                                                                 |             |
| Title                             | <a href="#">#1</a> Descriptive title identifying the study design, population, interventions, and, if applicable, trial acronym | Page 1      |
| Trial registration                | <a href="#">#2a</a> Trial identifier and registry name. If not yet registered,                                                  | Page 1      |

|    |                     |                                                                             |            |
|----|---------------------|-----------------------------------------------------------------------------|------------|
| 1  |                     | name of intended registry                                                   |            |
| 2  |                     |                                                                             |            |
| 3  |                     |                                                                             |            |
| 4  | Trial registration: | <a href="#">#2b</a> All items from the World Health Organization Trial      | Page 2     |
| 5  |                     |                                                                             |            |
| 6  | data set            | Registration Data Set                                                       |            |
| 7  |                     |                                                                             |            |
| 8  |                     |                                                                             |            |
| 9  | Protocol version    | <a href="#">#3</a> Date and version identifier                              |            |
| 10 |                     |                                                                             |            |
| 11 |                     |                                                                             |            |
| 12 | Funding             | <a href="#">#4</a> Sources and types of financial, material, and other      | Page 11    |
| 13 |                     |                                                                             |            |
| 14 |                     | support                                                                     |            |
| 15 |                     |                                                                             |            |
| 16 |                     |                                                                             |            |
| 17 | Roles and           | <a href="#">#5a</a> Names, affiliations, and roles of protocol contributors | Page 1     |
| 18 |                     |                                                                             |            |
| 19 | responsibilities:   |                                                                             |            |
| 20 |                     |                                                                             |            |
| 21 | contributorship     |                                                                             |            |
| 22 |                     |                                                                             |            |
| 23 |                     |                                                                             |            |
| 24 |                     |                                                                             |            |
| 25 | Roles and           | <a href="#">#5b</a> Name and contact information for the trial sponsor      | Page 1     |
| 26 |                     |                                                                             |            |
| 27 | responsibilities:   |                                                                             |            |
| 28 |                     |                                                                             |            |
| 29 | sponsor contact     |                                                                             |            |
| 30 |                     |                                                                             |            |
| 31 | information         |                                                                             |            |
| 32 |                     |                                                                             |            |
| 33 |                     |                                                                             |            |
| 34 |                     |                                                                             |            |
| 35 | Roles and           | <a href="#">#5c</a> Role of study sponsor and funders, if any, in study     | n/a (study |
| 36 |                     |                                                                             |            |
| 37 | responsibilities:   | design; collection, management, analysis, and                               | sponsor or |
| 38 |                     |                                                                             |            |
| 39 | sponsor and funder  | interpretation of data; writing of the report; and the                      | funders)   |
| 40 |                     |                                                                             |            |
| 41 |                     |                                                                             |            |
| 42 |                     | decision to submit the report for publication, including                    |            |
| 43 |                     |                                                                             |            |
| 44 |                     | whether they will have ultimate authority over any of                       |            |
| 45 |                     |                                                                             |            |
| 46 |                     | these activities                                                            |            |
| 47 |                     |                                                                             |            |
| 48 |                     |                                                                             |            |
| 49 | Roles and           | <a href="#">#5d</a> Composition, roles, and responsibilities of the         | Page 9     |
| 50 |                     |                                                                             |            |
| 51 | responsibilities:   | coordinating centre, steering committee, endpoint                           |            |
| 52 |                     |                                                                             |            |
| 53 | committees          | adjudication committee, data management team, and                           |            |
| 54 |                     |                                                                             |            |
| 55 |                     |                                                                             |            |
| 56 |                     | other individuals or groups overseeing the trial, if                        |            |
| 57 |                     |                                                                             |            |
| 58 |                     |                                                                             |            |
| 59 |                     |                                                                             |            |
| 60 |                     |                                                                             |            |

applicable (see Item 21a for data monitoring  
committee)

## Introduction

Background and [#6a](#) Description of research question and justification for Page 4  
rationale undertaking the trial, including summary of relevant  
studies (published and unpublished) examining  
benefits and harms for each intervention

Background and [#6b](#) Explanation for choice of comparators Page 7  
rationale: choice of  
comparators

Objectives [#7](#) Specific objectives or hypotheses Page 4

Trial design [#8](#) Description of trial design including type of trial (eg, Page 5  
parallel group, crossover, factorial, single group),  
allocation ratio, and framework (eg, superiority,  
equivalence, non-inferiority, exploratory)

## Methods:

Participants,  
interventions, and  
outcomes

Study setting [#9](#) Description of study settings (eg, community clinic, Page 5 and  
academic hospital) and list of countries where data Page 7  
will be collected. Reference to where list of study sites  
can be obtained

|                                                                                                                      |                                    |                      |                                                                                                                                                                                                                                                                                                                                                                                |                      |
|----------------------------------------------------------------------------------------------------------------------|------------------------------------|----------------------|--------------------------------------------------------------------------------------------------------------------------------------------------------------------------------------------------------------------------------------------------------------------------------------------------------------------------------------------------------------------------------|----------------------|
| 1<br>2<br>3<br>4<br>5<br>6<br>7<br>8<br>9                                                                            | Eligibility criteria               | <a href="#">#10</a>  | Inclusion and exclusion criteria for participants. If applicable, eligibility criteria for study centres and individuals who will perform the interventions (eg, surgeons, psychotherapists)                                                                                                                                                                                   | Page 5               |
| 10<br>11<br>12<br>13<br>14<br>15<br>16<br>17<br>18                                                                   | Interventions:<br>description      | <a href="#">#11a</a> | Interventions for each group with sufficient detail to allow replication, including how and when they will be administered                                                                                                                                                                                                                                                     | Page 7               |
| 19<br>20<br>21<br>22<br>23<br>24<br>25<br>26<br>27<br>28                                                             | Interventions:<br>modifications    | <a href="#">#11b</a> | Criteria for discontinuing or modifying allocated interventions for a given trial participant (eg, drug dose change in response to harms, participant request, or improving / worsening disease)                                                                                                                                                                               | Page 8               |
| 29<br>30<br>31<br>32<br>33<br>34<br>35                                                                               | Interventions:<br>adherence        | <a href="#">#11c</a> | Strategies to improve adherence to intervention protocols, and any procedures for monitoring adherence (eg, drug tablet return; laboratory tests)                                                                                                                                                                                                                              | Page 9               |
| 36<br>37<br>38<br>39<br>40                                                                                           | Interventions:<br>concomitant care | <a href="#">#11d</a> | Relevant concomitant care and interventions that are permitted or prohibited during the trial                                                                                                                                                                                                                                                                                  | Page 7               |
| 41<br>42<br>43<br>44<br>45<br>46<br>47<br>48<br>49<br>50<br>51<br>52<br>53<br>54<br>55<br>56<br>57<br>58<br>59<br>60 | Outcomes                           | <a href="#">#12</a>  | Primary, secondary, and other outcomes, including the specific measurement variable (eg, systolic blood pressure), analysis metric (eg, change from baseline, final value, time to event), method of aggregation (eg, median, proportion), and time point for each outcome. Explanation of the clinical relevance of chosen efficacy and harm outcomes is strongly recommended | Page 8 and<br>Page 9 |

|    |                           |                      |                                                          |         |
|----|---------------------------|----------------------|----------------------------------------------------------|---------|
| 1  | Participant timeline      | <a href="#">#13</a>  | Time schedule of enrolment, interventions (including     | Page 15 |
| 2  |                           |                      | any run-ins and washouts), assessments, and visits       |         |
| 3  |                           |                      | for participants. A schematic diagram is highly          |         |
| 4  |                           |                      | recommended (see Figure)                                 |         |
| 5  |                           |                      |                                                          |         |
| 6  |                           |                      |                                                          |         |
| 7  |                           |                      |                                                          |         |
| 8  |                           |                      |                                                          |         |
| 9  |                           |                      |                                                          |         |
| 10 |                           |                      |                                                          |         |
| 11 | Sample size               | <a href="#">#14</a>  | Estimated number of participants needed to achieve       | Page 6  |
| 12 |                           |                      | study objectives and how it was determined, including    |         |
| 13 |                           |                      | clinical and statistical assumptions supporting any      |         |
| 14 |                           |                      | sample size calculations                                 |         |
| 15 |                           |                      |                                                          |         |
| 16 |                           |                      |                                                          |         |
| 17 |                           |                      |                                                          |         |
| 18 |                           |                      |                                                          |         |
| 19 |                           |                      |                                                          |         |
| 20 |                           |                      |                                                          |         |
| 21 | Recruitment               | <a href="#">#15</a>  | Strategies for achieving adequate participant            | Page 5  |
| 22 |                           |                      | enrolment to reach target sample size                    |         |
| 23 |                           |                      |                                                          |         |
| 24 |                           |                      |                                                          |         |
| 25 |                           |                      |                                                          |         |
| 26 | <b>Methods:</b>           |                      |                                                          |         |
| 27 |                           |                      |                                                          |         |
| 28 | <b>Assignment of</b>      |                      |                                                          |         |
| 29 | <b>interventions (for</b> |                      |                                                          |         |
| 30 | <b>controlled trials)</b> |                      |                                                          |         |
| 31 |                           |                      |                                                          |         |
| 32 |                           |                      |                                                          |         |
| 33 |                           |                      |                                                          |         |
| 34 |                           |                      |                                                          |         |
| 35 |                           |                      |                                                          |         |
| 36 | Allocation: sequence      | <a href="#">#16a</a> | Method of generating the allocation sequence (eg,        | Page 6  |
| 37 | generation                |                      | computer-generated random numbers), and list of          |         |
| 38 |                           |                      | any factors for stratification. To reduce predictability |         |
| 39 |                           |                      | of a random sequence, details of any planned             |         |
| 40 |                           |                      | restriction (eg, blocking) should be provided in a       |         |
| 41 |                           |                      | separate document that is unavailable to those who       |         |
| 42 |                           |                      | enrol participants or assign interventions               |         |
| 43 |                           |                      |                                                          |         |
| 44 |                           |                      |                                                          |         |
| 45 |                           |                      |                                                          |         |
| 46 |                           |                      |                                                          |         |
| 47 |                           |                      |                                                          |         |
| 48 |                           |                      |                                                          |         |
| 49 |                           |                      |                                                          |         |
| 50 |                           |                      |                                                          |         |
| 51 |                           |                      |                                                          |         |
| 52 |                           |                      |                                                          |         |
| 53 | Allocation                | <a href="#">#16b</a> | Mechanism of implementing the allocation sequence        | Page 6  |
| 54 | concealment               |                      | (eg, central telephone; sequentially numbered,           |         |
| 55 | mechanism                 |                      | opaque, sealed envelopes), describing any steps to       |         |
| 56 |                           |                      |                                                          |         |
| 57 |                           |                      |                                                          |         |
| 58 |                           |                      |                                                          |         |
| 59 |                           |                      |                                                          |         |
| 60 |                           |                      |                                                          |         |

conceal the sequence until interventions are assigned

1  
2  
3  
4 Allocation: [#16c](#) Who will generate the allocation sequence, who will Page 6  
5  
6 implementation enrol participants, and who will assign participants to  
7  
8 interventions  
9

10  
11 Blinding (masking) [#17a](#) Who will be blinded after assignment to interventions Page 6  
12  
13 (eg, trial participants, care providers, outcome  
14  
15 assessors, data analysts), and how  
16  
17

18  
19 Blinding (masking): [#17b](#) If blinded, circumstances under which unblinding is Page 6  
20  
21 emergency permissible, and procedure for revealing a  
22  
23 unblinding participant's allocated intervention during the trial  
24  
25

26 **Methods: Data**  
27  
28 **collection,**  
29  
30 **management, and**  
31  
32 **analysis**  
33  
34  
35

36 Data collection plan [#18a](#) Plans for assessment and collection of outcome, Page 9  
37  
38 baseline, and other trial data, including any related  
39  
40 processes to promote data quality (eg, duplicate  
41  
42 measurements, training of assessors) and a  
43  
44 description of study instruments (eg, questionnaires,  
45  
46 laboratory tests) along with their reliability and validity,  
47  
48 if known. Reference to where data collection forms  
49  
50 can be found, if not in the protocol  
51  
52  
53  
54

55 Data collection plan: [#18b](#) Plans to promote participant retention and complete Page 9  
56  
57 retention follow-up, including list of any outcome data to be  
58  
59

1 collected for participants who discontinue or deviate  
2  
3 from intervention protocols  
4

5  
6 **Data management** [#19](#) Plans for data entry, coding, security, and storage, Page 9  
7  
8 including any related processes to promote data  
9  
10 quality (eg, double data entry; range checks for data  
11  
12 values). Reference to where details of data  
13  
14 management procedures can be found, if not in the  
15  
16 protocol  
17  
18

19  
20 **Statistics: outcomes** [#20a](#) Statistical methods for analysing primary and Page 10  
21  
22 secondary outcomes. Reference to where other  
23  
24 details of the statistical analysis plan can be found, if  
25  
26 not in the protocol  
27  
28

29  
30 **Statistics: additional** [#20b](#) Methods for any additional analyses (eg, subgroup Page 10  
31  
32 analyses and adjusted analyses)  
33  
34

35 **Statistics: analysis** [#20c](#) Definition of analysis population relating to protocol Page 10  
36  
37 population and non-adherence (eg, as randomised analysis), and  
38  
39 missing data any statistical methods to handle missing data (eg,  
40  
41 multiple imputation)  
42  
43  
44

## 45 **Methods: Monitoring**

46  
47  
48 **Data monitoring:** [#21a](#) Composition of data monitoring committee (DMC); Page 9  
49  
50 formal committee summary of its role and reporting structure; statement  
51  
52 of whether it is independent from the sponsor and  
53  
54 competing interests; and reference to where further  
55  
56 details about its charter can be found, if not in the  
57  
58



|    |                      |                                                                          |                 |
|----|----------------------|--------------------------------------------------------------------------|-----------------|
| 1  |                      | protocol. Alternatively, an explanation of why a DMC                     |                 |
| 2  |                      |                                                                          |                 |
| 3  |                      | is not needed                                                            |                 |
| 4  |                      |                                                                          |                 |
| 5  |                      |                                                                          |                 |
| 6  | Data monitoring:     | <a href="#">#21b</a> Description of any interim analyses and stopping    | n/a (No         |
| 7  |                      |                                                                          |                 |
| 8  | interim analysis     | guidelines, including who will have access to these                      | midterm         |
| 9  |                      |                                                                          |                 |
| 10 |                      | interim results and make the final decision to                           | analysis)       |
| 11 |                      |                                                                          |                 |
| 12 |                      | terminate the trial                                                      |                 |
| 13 |                      |                                                                          |                 |
| 14 |                      |                                                                          |                 |
| 15 |                      |                                                                          |                 |
| 16 | Harms                | <a href="#">#22</a> Plans for collecting, assessing, reporting, and      | Page 9 and      |
| 17 |                      |                                                                          |                 |
| 18 |                      | managing solicited and spontaneously reported                            | Page 10         |
| 19 |                      |                                                                          |                 |
| 20 |                      | adverse events and other unintended effects of trial                     |                 |
| 21 |                      |                                                                          |                 |
| 22 |                      | interventions or trial conduct                                           |                 |
| 23 |                      |                                                                          |                 |
| 24 |                      |                                                                          |                 |
| 25 |                      |                                                                          |                 |
| 26 | Auditing             | <a href="#">#23</a> Frequency and procedures for auditing trial conduct, | n/a (See Ethics |
| 27 |                      |                                                                          |                 |
| 28 |                      | if any, and whether the process will be independent                      | Committee       |
| 29 |                      |                                                                          |                 |
| 30 |                      | from investigators and the sponsor                                       | Review          |
| 31 |                      |                                                                          |                 |
| 32 |                      |                                                                          |                 |
| 33 |                      |                                                                          | Approval)       |
| 34 |                      |                                                                          |                 |
| 35 |                      |                                                                          |                 |
| 36 | <b>Ethics and</b>    |                                                                          |                 |
| 37 |                      |                                                                          |                 |
| 38 | <b>dissemination</b> |                                                                          |                 |
| 39 |                      |                                                                          |                 |
| 40 |                      |                                                                          |                 |
| 41 | Research ethics      | <a href="#">#24</a> Plans for seeking research ethics committee /        | Page 10         |
| 42 |                      |                                                                          |                 |
| 43 | approval             | institutional review board (REC / IRB) approval                          |                 |
| 44 |                      |                                                                          |                 |
| 45 |                      |                                                                          |                 |
| 46 | Protocol             | <a href="#">#25</a> Plans for communicating important protocol           | Page 11         |
| 47 |                      |                                                                          |                 |
| 48 | amendments           | modifications (eg, changes to eligibility criteria,                      |                 |
| 49 |                      |                                                                          |                 |
| 50 |                      | outcomes, analyses) to relevant parties (eg,                             |                 |
| 51 |                      |                                                                          |                 |
| 52 |                      | investigators, REC / IRBs, trial participants, trial                     |                 |
| 53 |                      |                                                                          |                 |
| 54 |                      | registries, journals, regulators)                                        |                 |
| 55 |                      |                                                                          |                 |
| 56 |                      |                                                                          |                 |
| 57 |                      |                                                                          |                 |
| 58 |                      |                                                                          |                 |
| 59 |                      |                                                                          |                 |
| 60 |                      |                                                                          |                 |

|    |                       |                      |                                                            |               |
|----|-----------------------|----------------------|------------------------------------------------------------|---------------|
| 1  | Consent or assent     | <a href="#">#26a</a> | Who will obtain informed consent or assent from            | Page 5        |
| 2  |                       |                      |                                                            |               |
| 3  |                       |                      |                                                            |               |
| 4  |                       |                      | potential trial participants or authorised surrogates,     |               |
| 5  |                       |                      |                                                            |               |
| 6  |                       |                      | and how (see Item 32)                                      |               |
| 7  |                       |                      |                                                            |               |
| 8  |                       |                      |                                                            |               |
| 9  | Consent or assent:    | <a href="#">#26b</a> | Additional consent provisions for collection and use of    | n/a (No plans |
| 10 |                       |                      |                                                            |               |
| 11 | ancillary studies     |                      | participant data and biological specimens in ancillary     | for other     |
| 12 |                       |                      |                                                            |               |
| 13 |                       |                      | studies, if applicable                                     | studies)      |
| 14 |                       |                      |                                                            |               |
| 15 |                       |                      |                                                            |               |
| 16 | Confidentiality       | <a href="#">#27</a>  | How personal information about potential and               | Page 9        |
| 17 |                       |                      |                                                            |               |
| 18 |                       |                      | enrolled participants will be collected, shared, and       |               |
| 19 |                       |                      |                                                            |               |
| 20 |                       |                      | maintained in order to protect confidentiality before,     |               |
| 21 |                       |                      |                                                            |               |
| 22 |                       |                      | during, and after the trial                                |               |
| 23 |                       |                      |                                                            |               |
| 24 |                       |                      |                                                            |               |
| 25 |                       |                      |                                                            |               |
| 26 | Declaration of        | <a href="#">#28</a>  | Financial and other competing interests for principal      | Page 11       |
| 27 |                       |                      |                                                            |               |
| 28 | interests             |                      | investigators for the overall trial and each study site    |               |
| 29 |                       |                      |                                                            |               |
| 30 |                       |                      |                                                            |               |
| 31 |                       |                      |                                                            |               |
| 32 | Data access           | <a href="#">#29</a>  | Statement of who will have access to the final trial       | Page 11       |
| 33 |                       |                      |                                                            |               |
| 34 |                       |                      | dataset, and disclosure of contractual agreements          |               |
| 35 |                       |                      |                                                            |               |
| 36 |                       |                      | that limit such access for investigators                   |               |
| 37 |                       |                      |                                                            |               |
| 38 |                       |                      |                                                            |               |
| 39 | Ancillary and post    | <a href="#">#30</a>  | Provisions, if any, for ancillary and post-trial care, and | Page 10       |
| 40 |                       |                      |                                                            |               |
| 41 | trial care            |                      | for compensation to those who suffer harm from trial       |               |
| 42 |                       |                      |                                                            |               |
| 43 |                       |                      | participation                                              |               |
| 44 |                       |                      |                                                            |               |
| 45 |                       |                      |                                                            |               |
| 46 |                       |                      |                                                            |               |
| 47 | Dissemination         | <a href="#">#31a</a> | Plans for investigators and sponsor to communicate         | Page 11       |
| 48 |                       |                      |                                                            |               |
| 49 | policy: trial results |                      | trial results to participants, healthcare professionals,   |               |
| 50 |                       |                      |                                                            |               |
| 51 |                       |                      | the public, and other relevant groups (eg, via             |               |
| 52 |                       |                      |                                                            |               |
| 53 |                       |                      | publication, reporting in results databases, or other      |               |
| 54 |                       |                      |                                                            |               |
| 55 |                       |                      | data sharing arrangements), including any publication      |               |
| 56 |                       |                      |                                                            |               |
| 57 |                       |                      |                                                            |               |
| 58 |                       |                      |                                                            |               |
| 59 |                       |                      |                                                            |               |
| 60 |                       |                      |                                                            |               |

1 restrictions

2  
3  
4 Dissemination [#31b](#) Authorship eligibility guidelines and any intended use Page 11  
5  
6 policy: authorship of professional writers  
7

8  
9 Dissemination [#31c](#) Plans, if any, for granting public access to the full n/a (No plan)  
10  
11 policy: reproducible protocol, participant-level dataset, and statistical code  
12  
13 research  
14

## 15 Appendices

16  
17  
18  
19 Informed consent [#32](#) Model consent form and other related documentation n/a (See  
20  
21 materials given to participants and authorised surrogates Informed  
22  
23 Consent)  
24  
25

26  
27 Biological [#33](#) Plans for collection, laboratory evaluation, and n/a (No  
28  
29 specimens storage of biological specimens for genetic or biological  
30  
31 molecular analysis in the current trial and for future specimens will  
32  
33 use in ancillary studies, if applicable be collected)  
34  
35  
36

37 None The SPIRIT Explanation and Elaboration paper is distributed under the terms of the Creative  
38  
39 Commons Attribution License CC-BY-NC. This checklist can be completed online using  
40  
41 <https://www.goodreports.org/>, a tool made by the [EQUATOR Network](#) in collaboration with  
42  
43 [Penelope.ai](#)  
44  
45  
46  
47  
48  
49  
50  
51  
52  
53  
54  
55  
56  
57  
58  
59  
60
